# Supplementary material for: Synthesis and antimicrobial potential of nitrofuran–triazole congeners
Source: Royal Society of Chemistry journal article supplement (doi:10.1039/c5ob01353d), 2015-01-01

### <sup>1</sup>H NMR Spectrum of Compound **6**

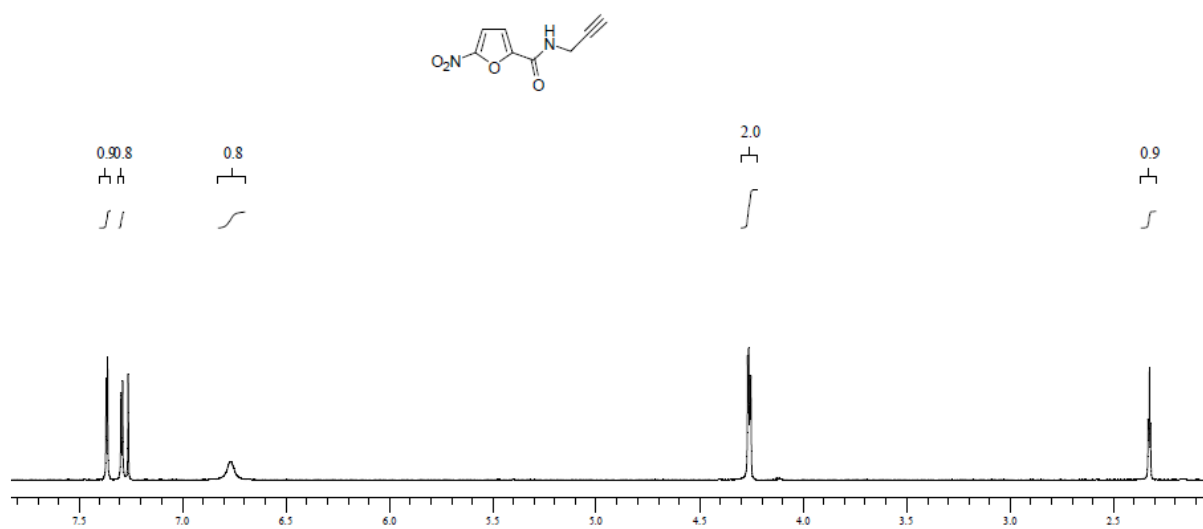

### <sup>1</sup>H NMR Spectrum of Compound **9a**

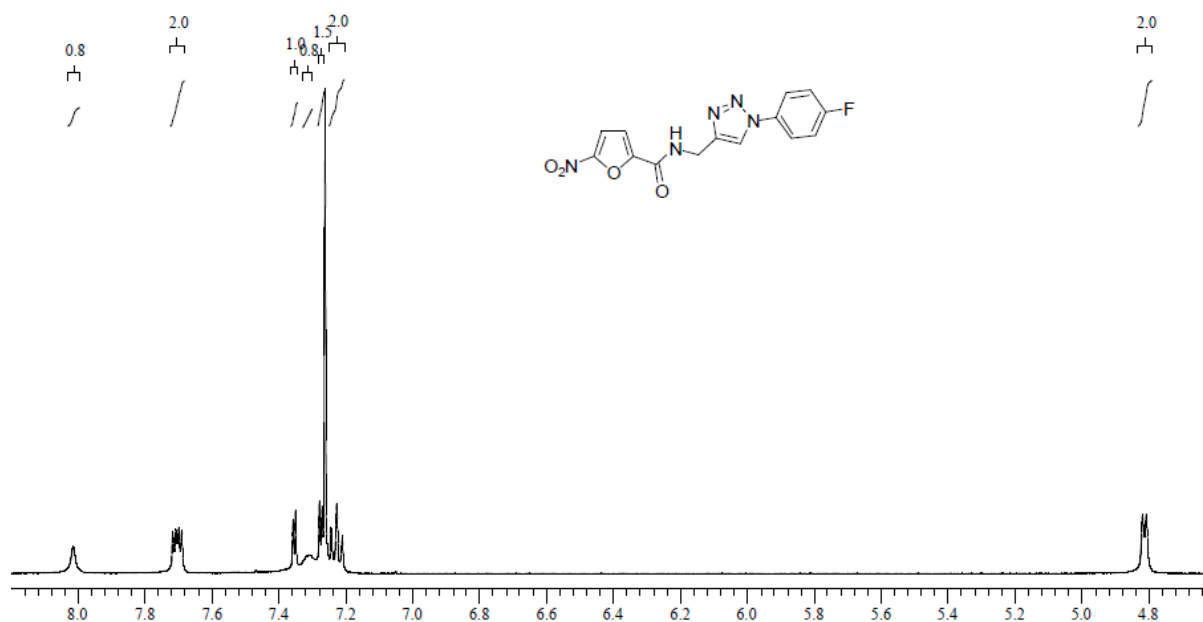

### <sup>13</sup>C NMR Spectrum of Compound **9a**

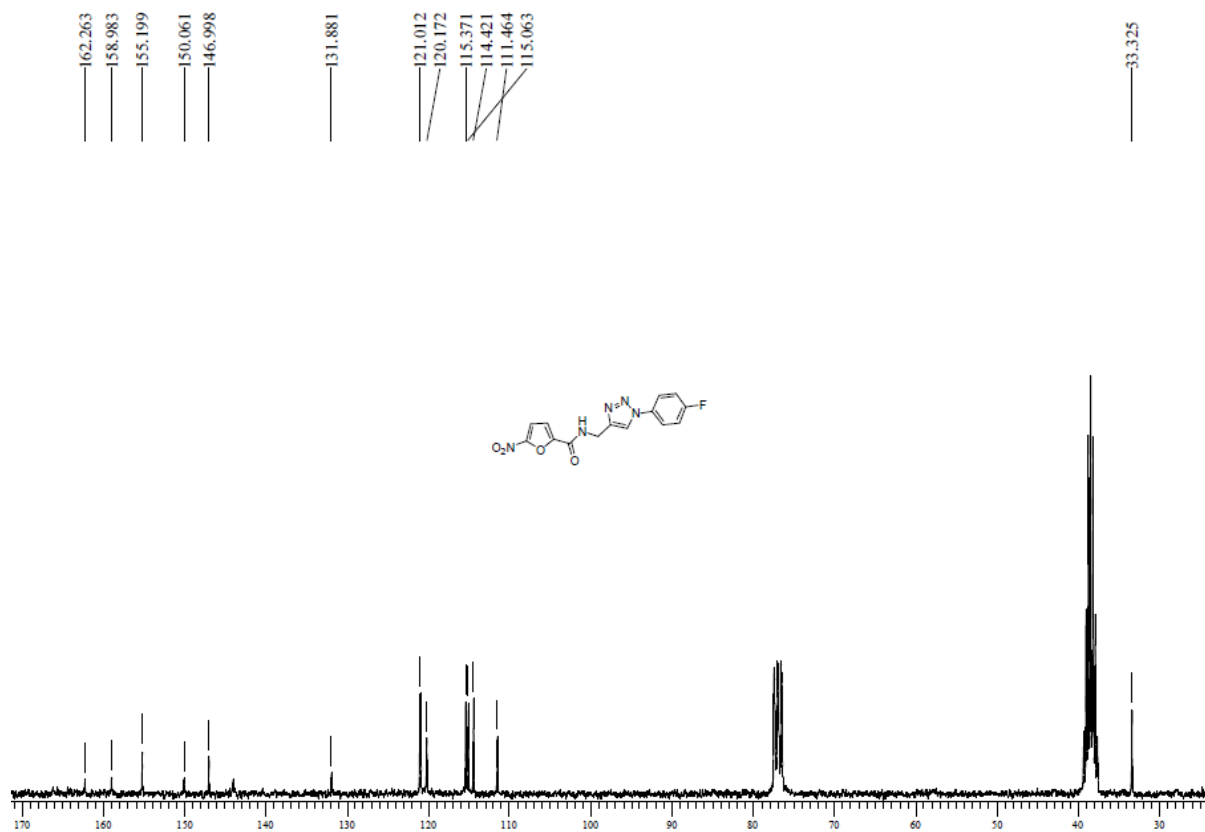

### HRMS of Compound **9a**

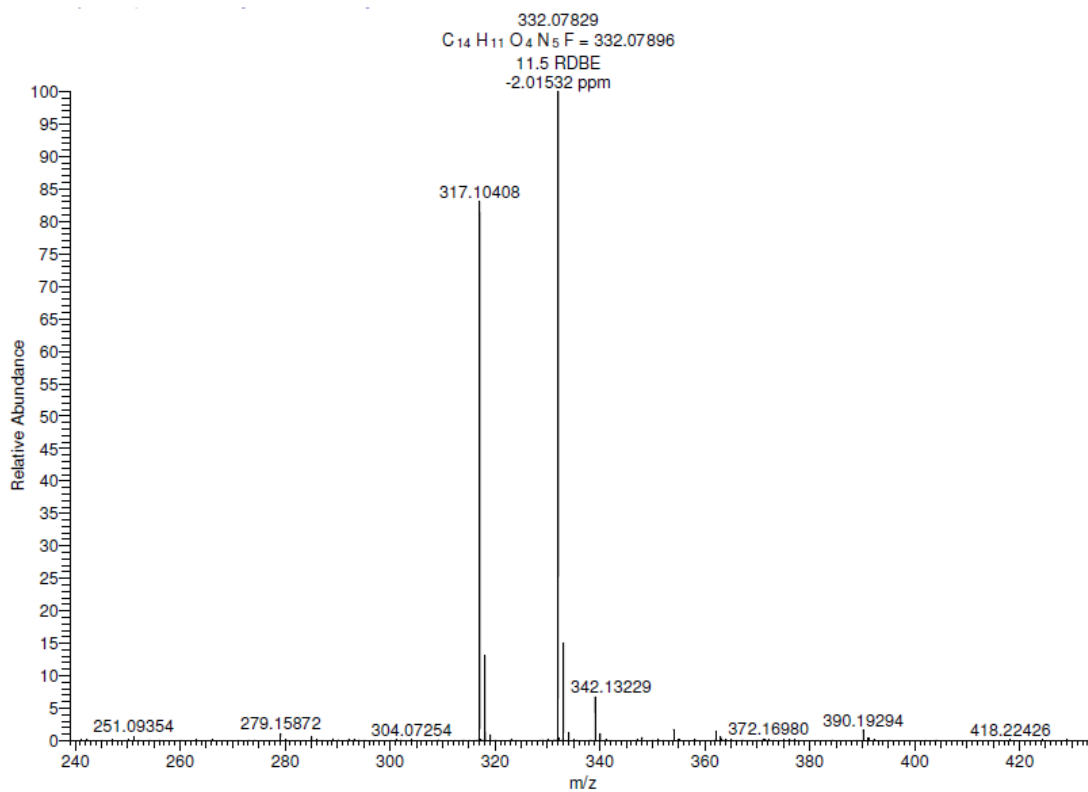

# <sup>1</sup>H NMR Spectrum of Compound **9b**

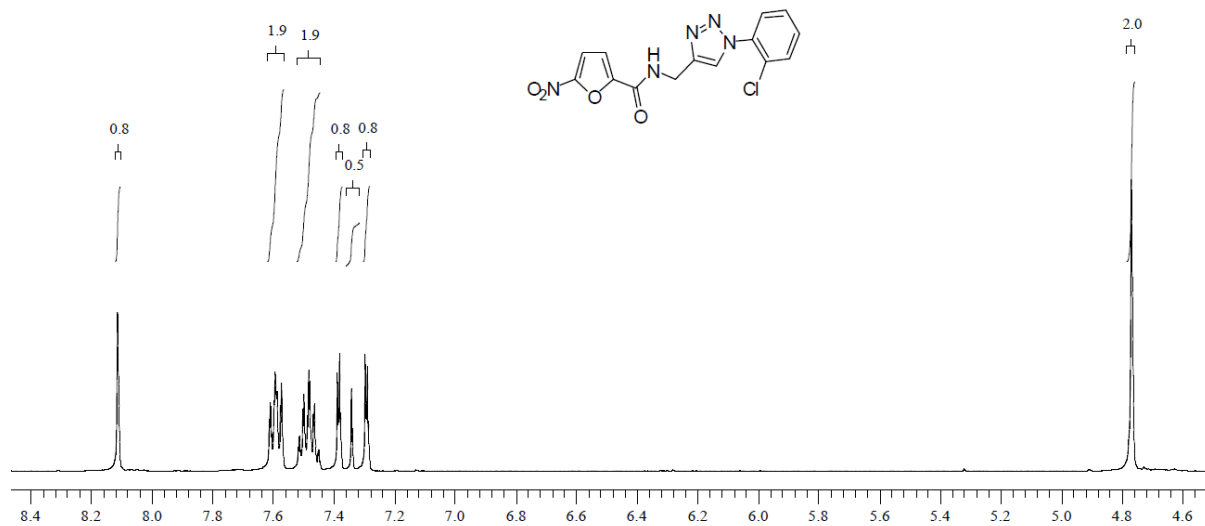

# <sup>13</sup>C NMR Spectrum of Compound **9b**

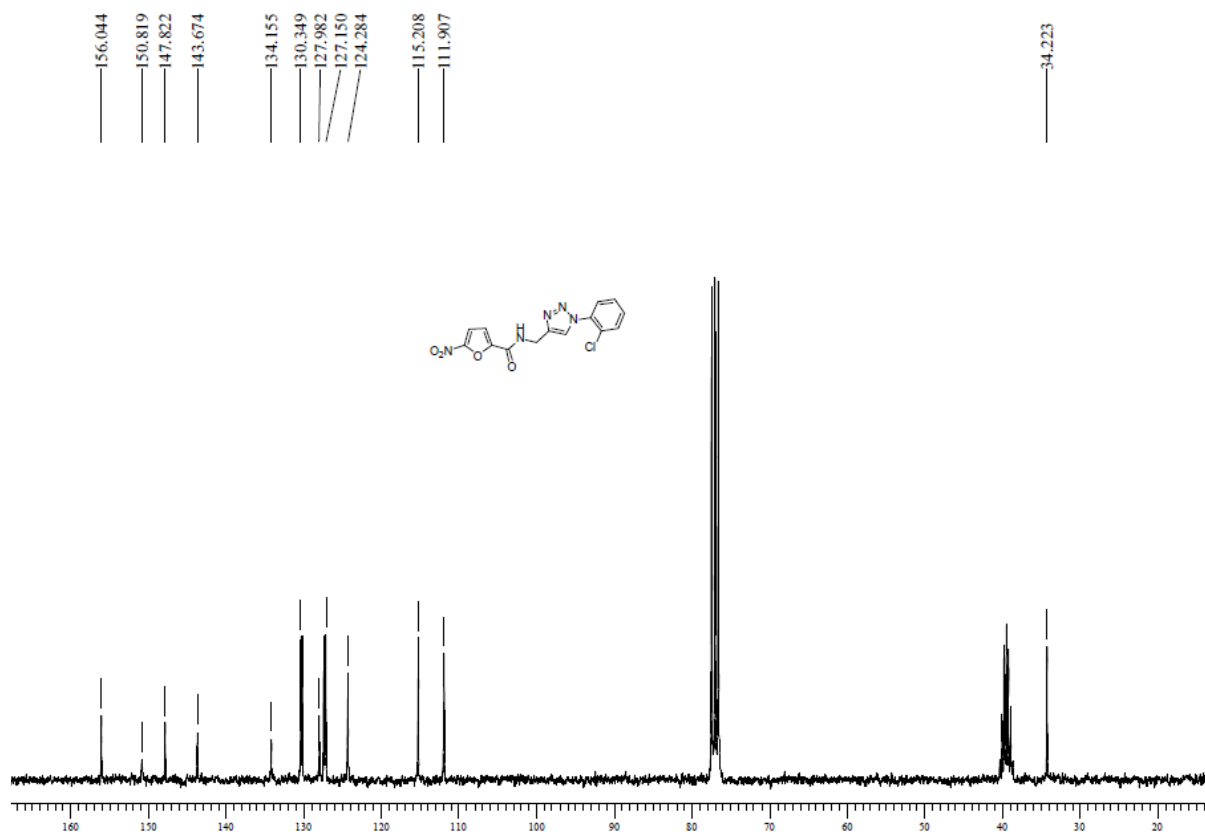

## HRMS of Compound **9b**

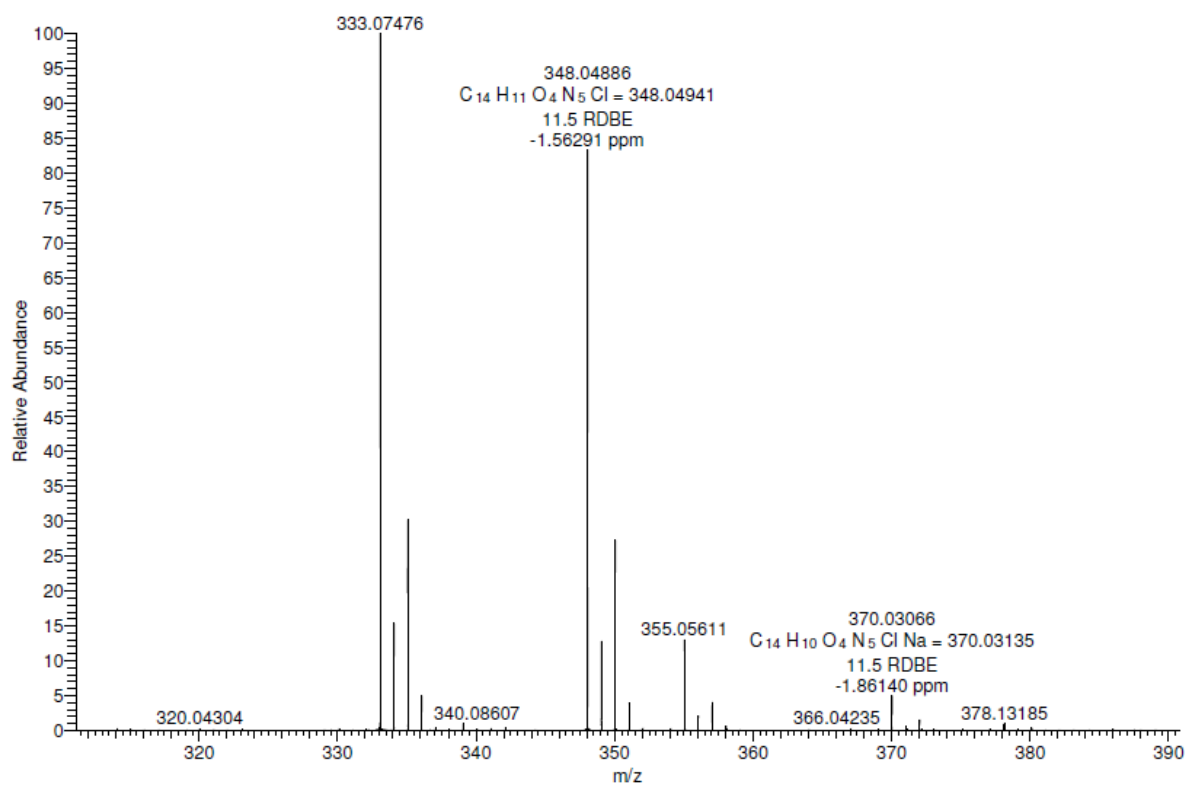

## <sup>1</sup>H NMR Spectrum of Compound **9c**

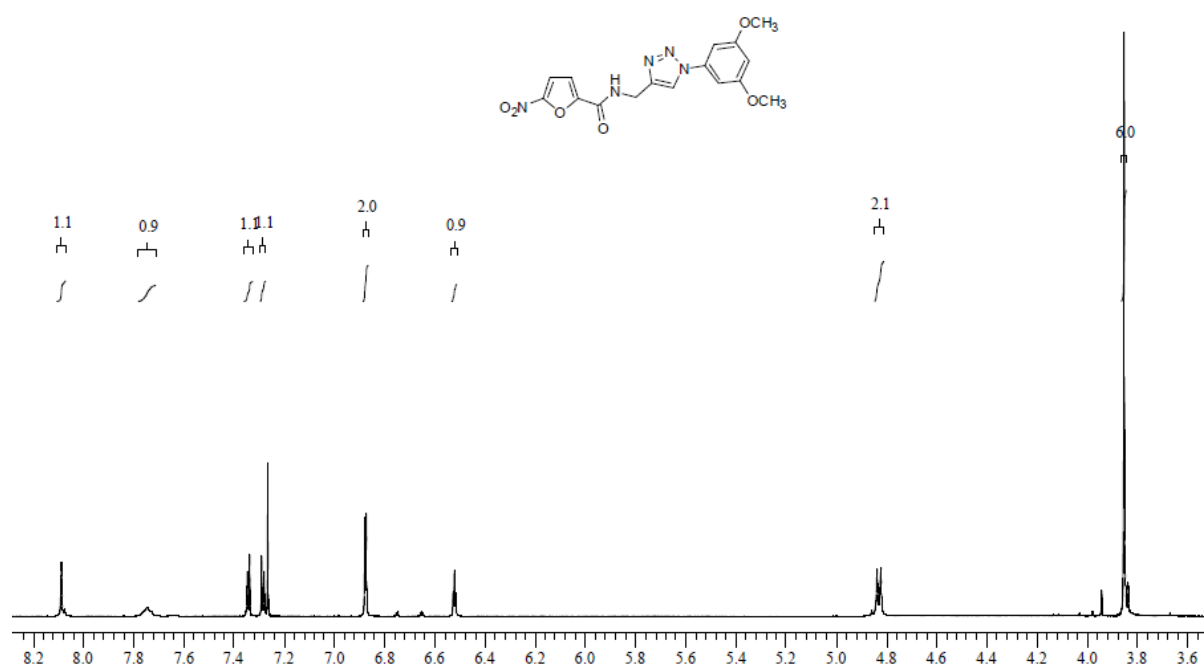

### <sup>13</sup>C NMR Spectrum of Compound 9c

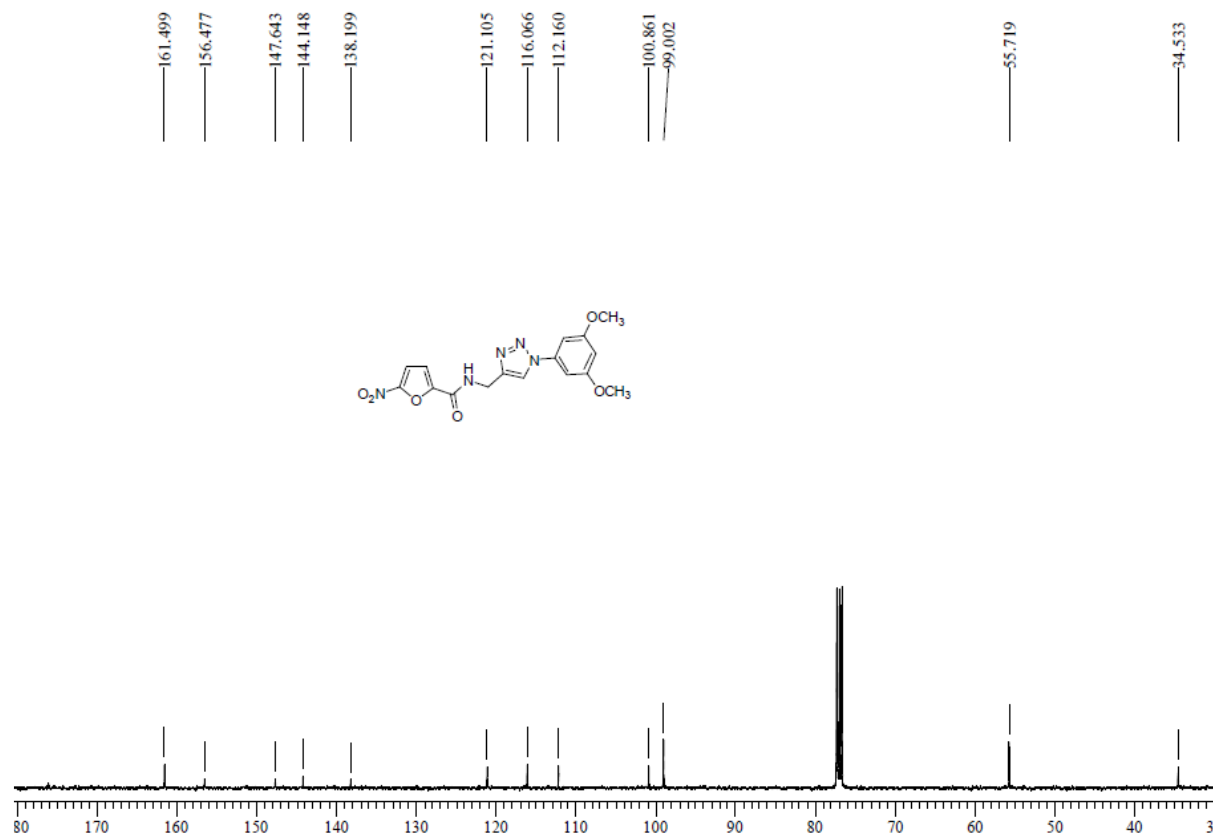

### HRMS of Compound 9c

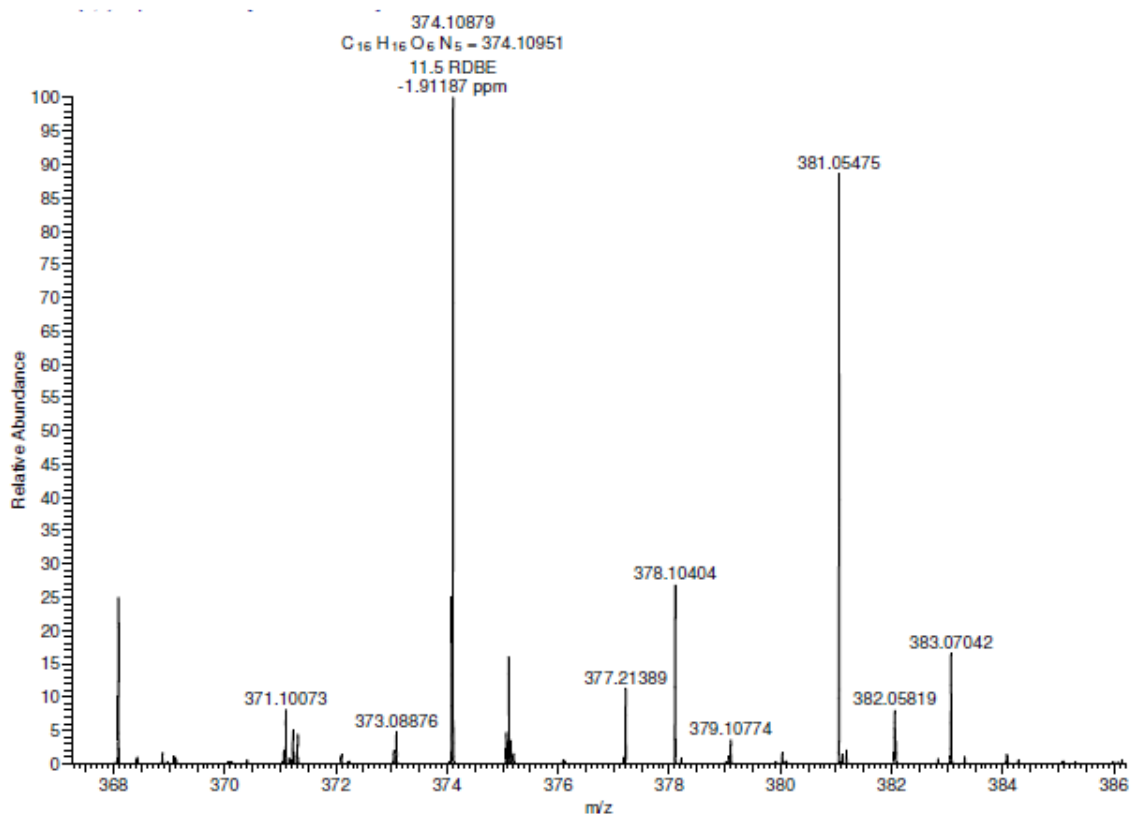

### <sup>1</sup>H NMR Spectrum of Compound **9d**

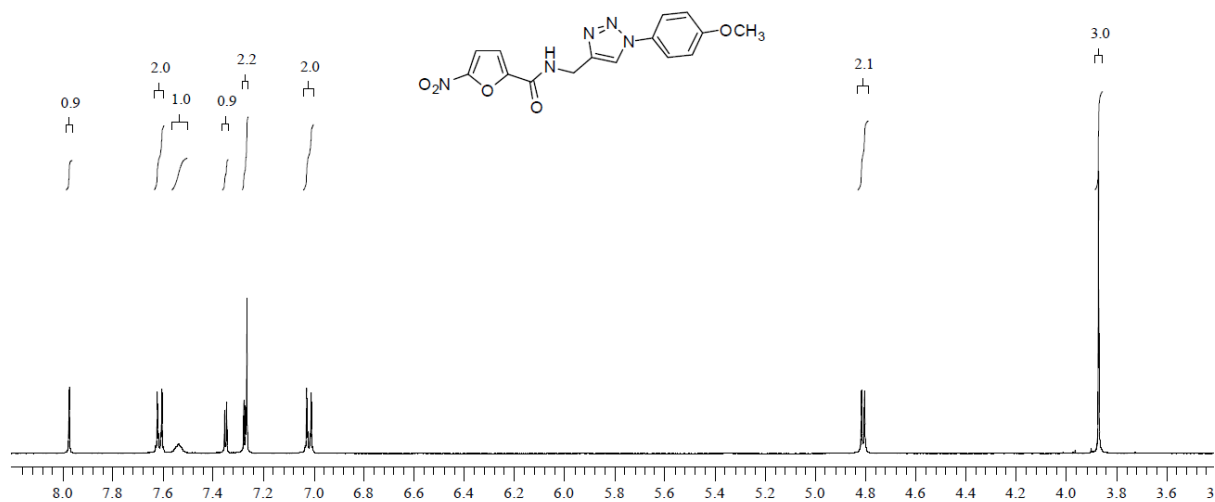

### <sup>13</sup>C NMR Spectrum of Compound **9d**

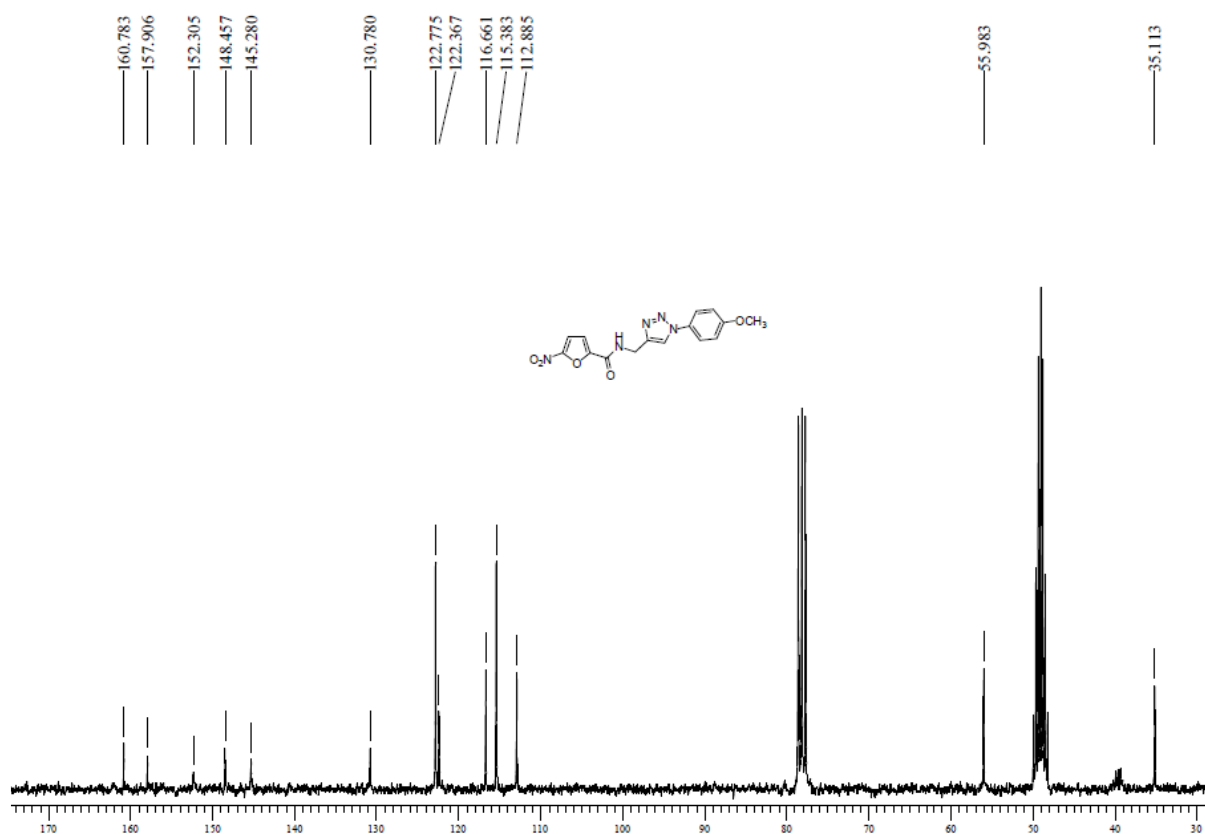

## HRMS of Compound **9d**

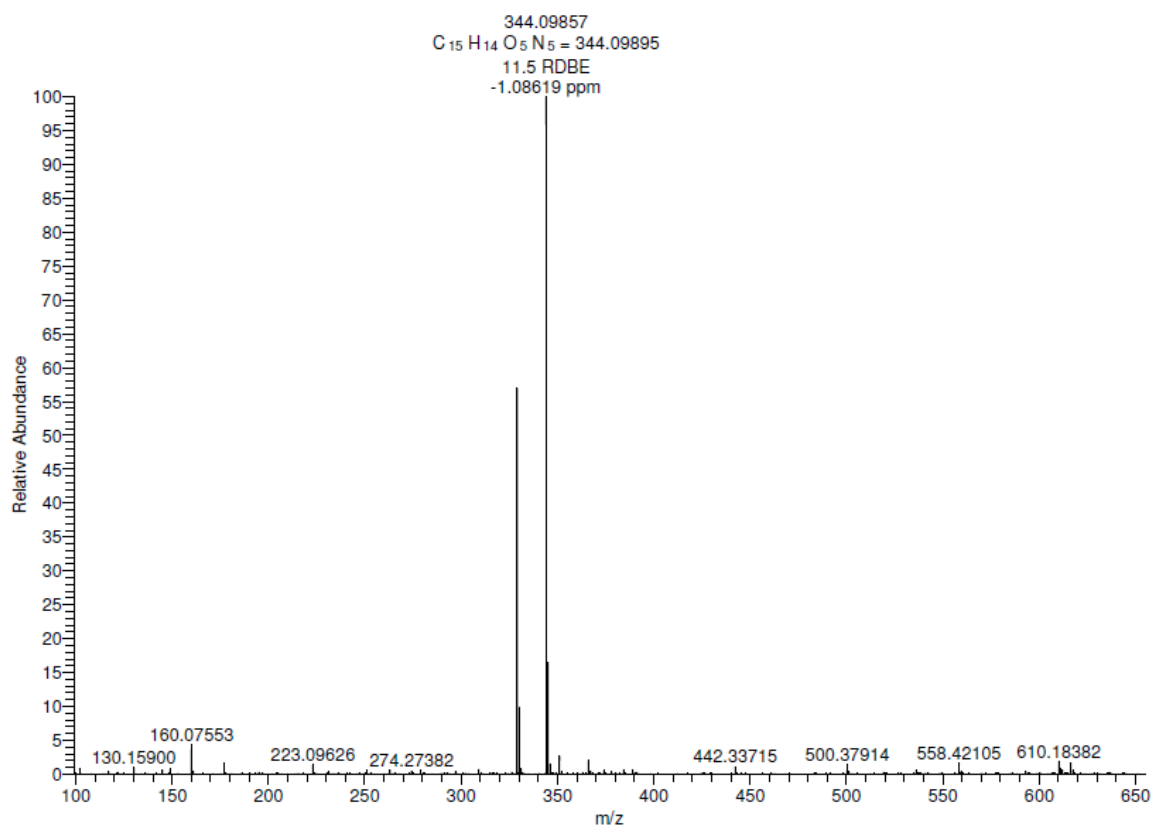

## <sup>1</sup>H NMR Spectrum of Compound **9e**

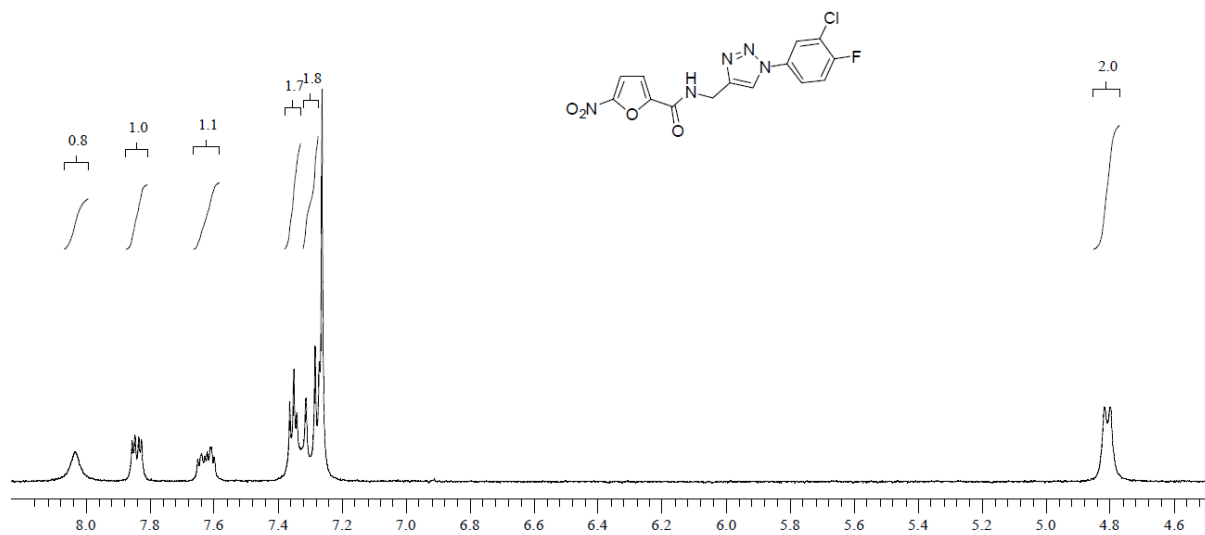

### $^{13}\text{C}$ NMR Spectrum of Compound **9e**

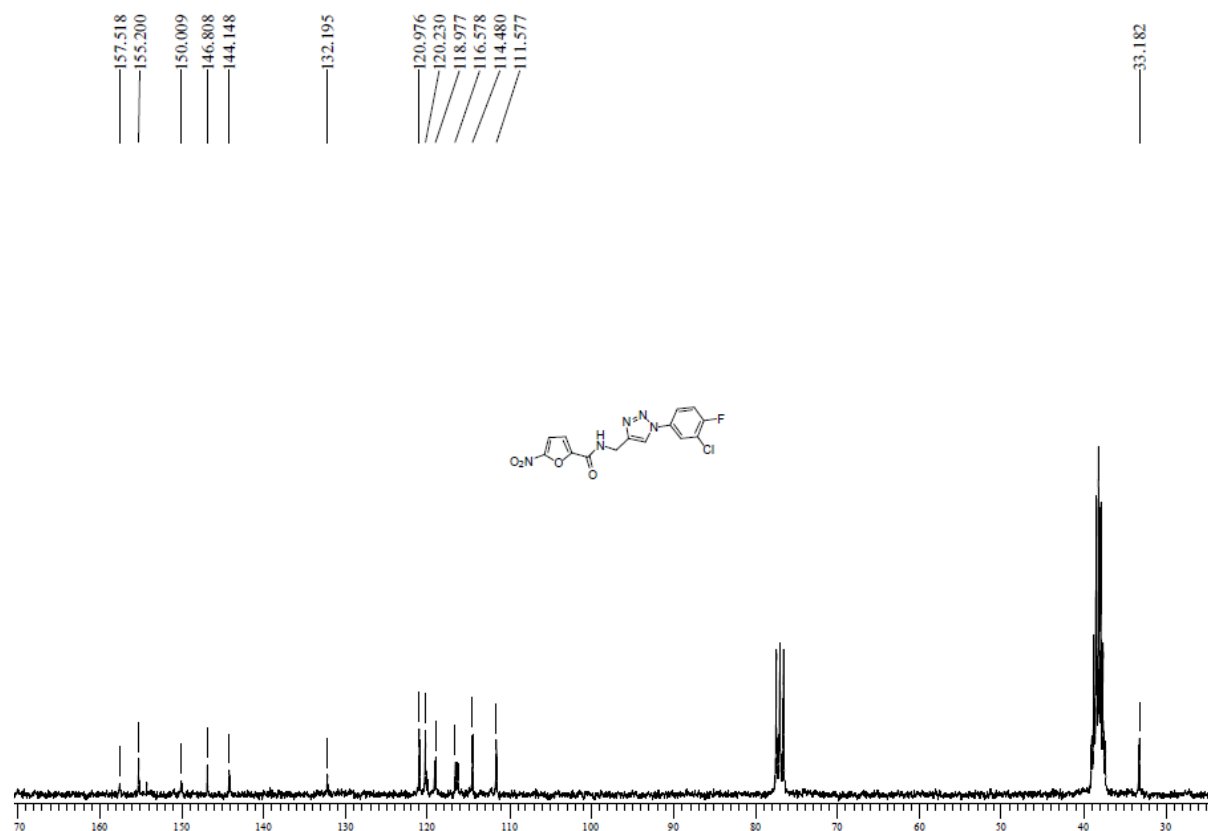

### HRMS of Compound **9e**

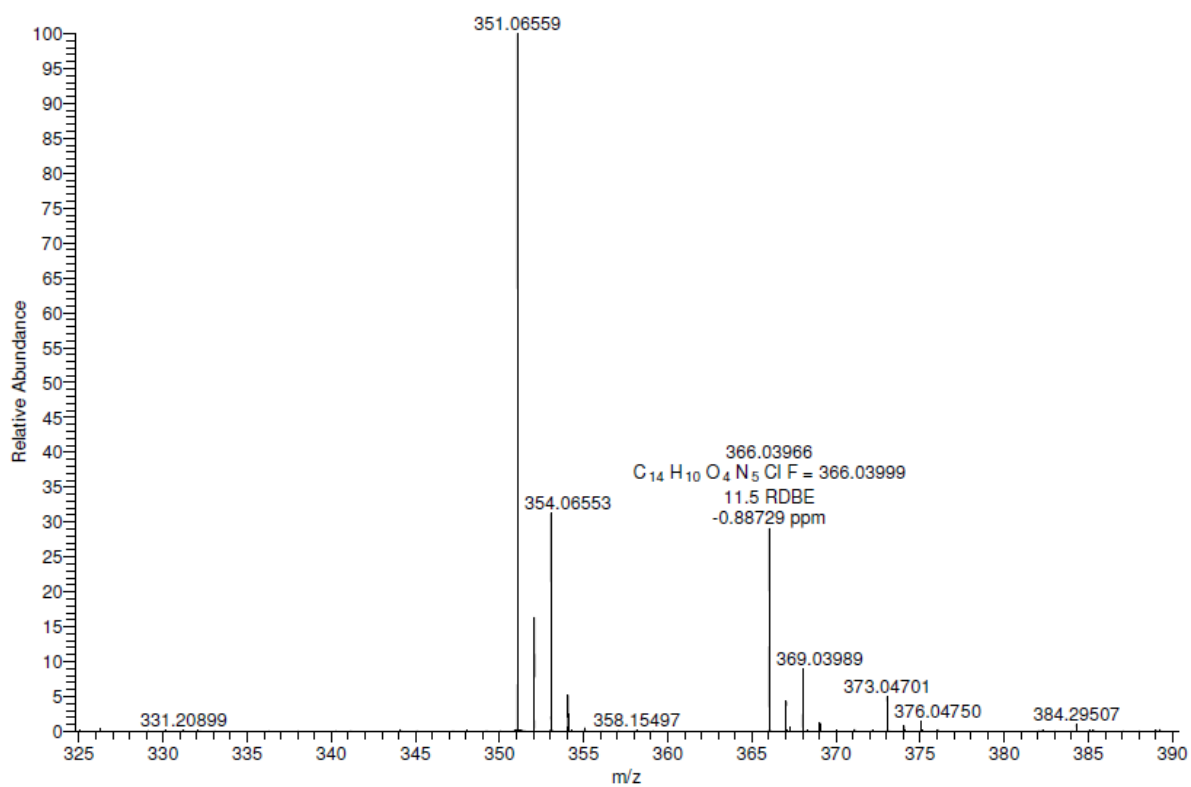



# <sup>1</sup>H NMR Spectrum of Compound **9f**

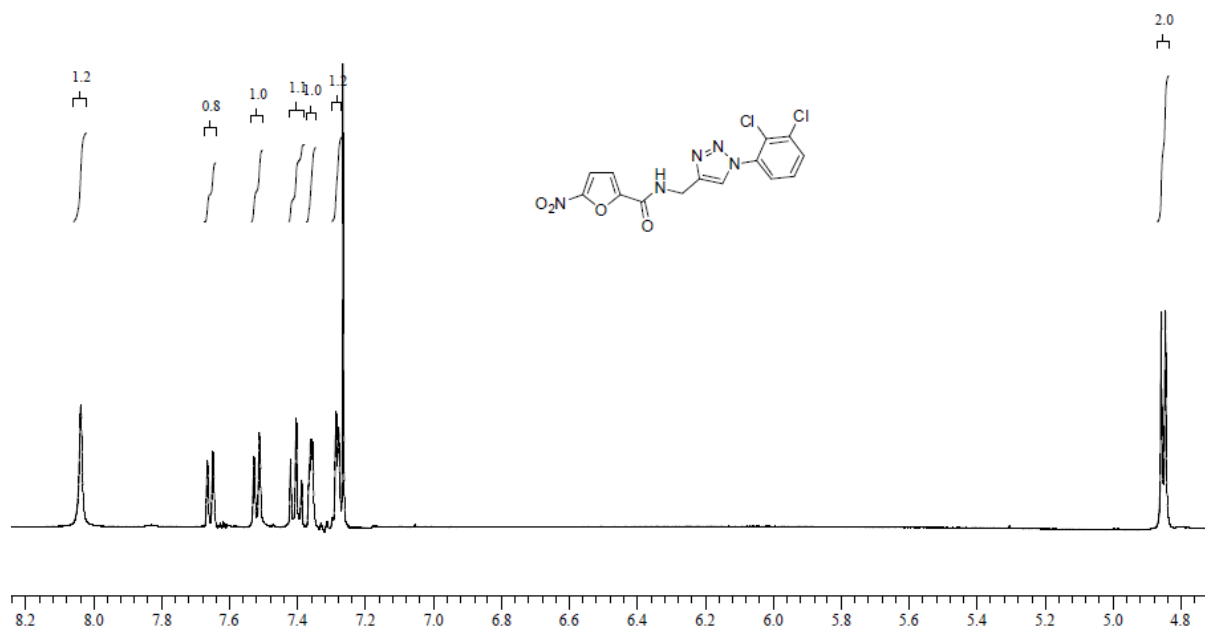

# <sup>13</sup>C NMR Spectrum of Compound **9f**

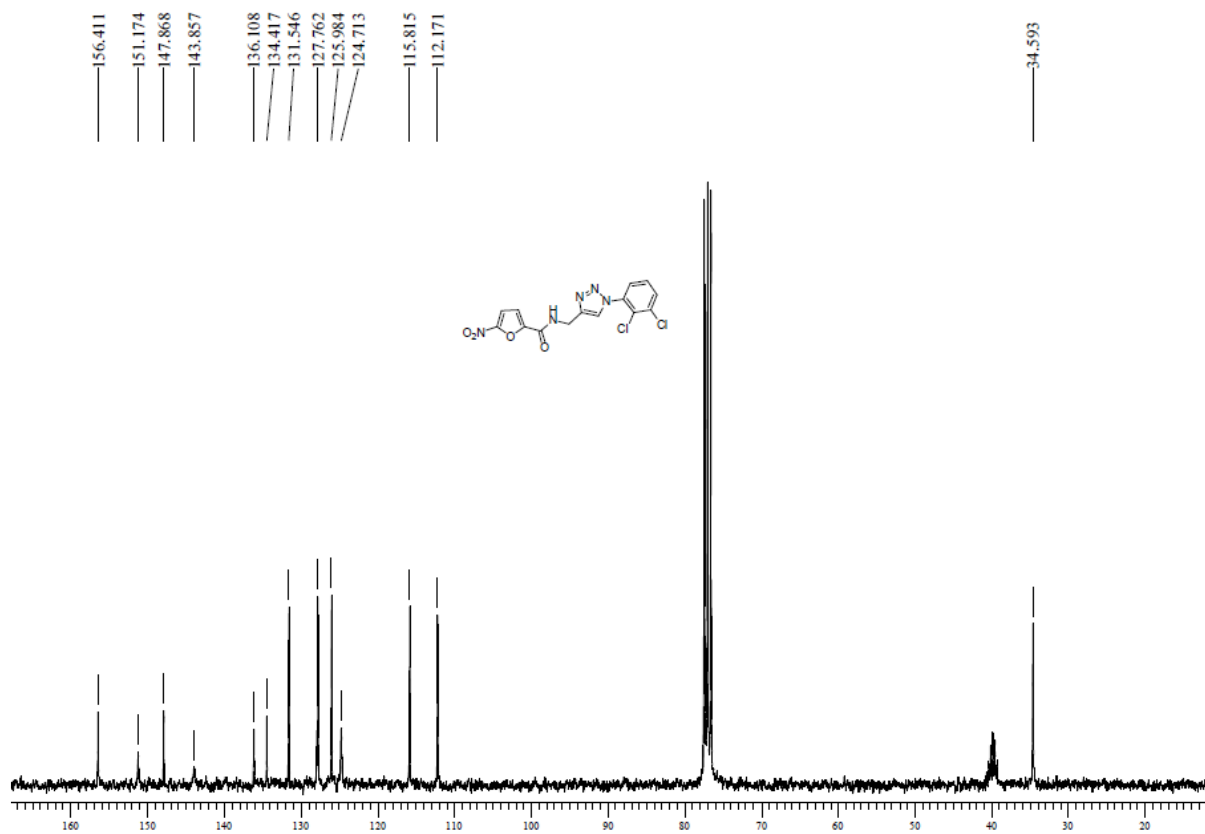

## HRMS of Compound **9f**

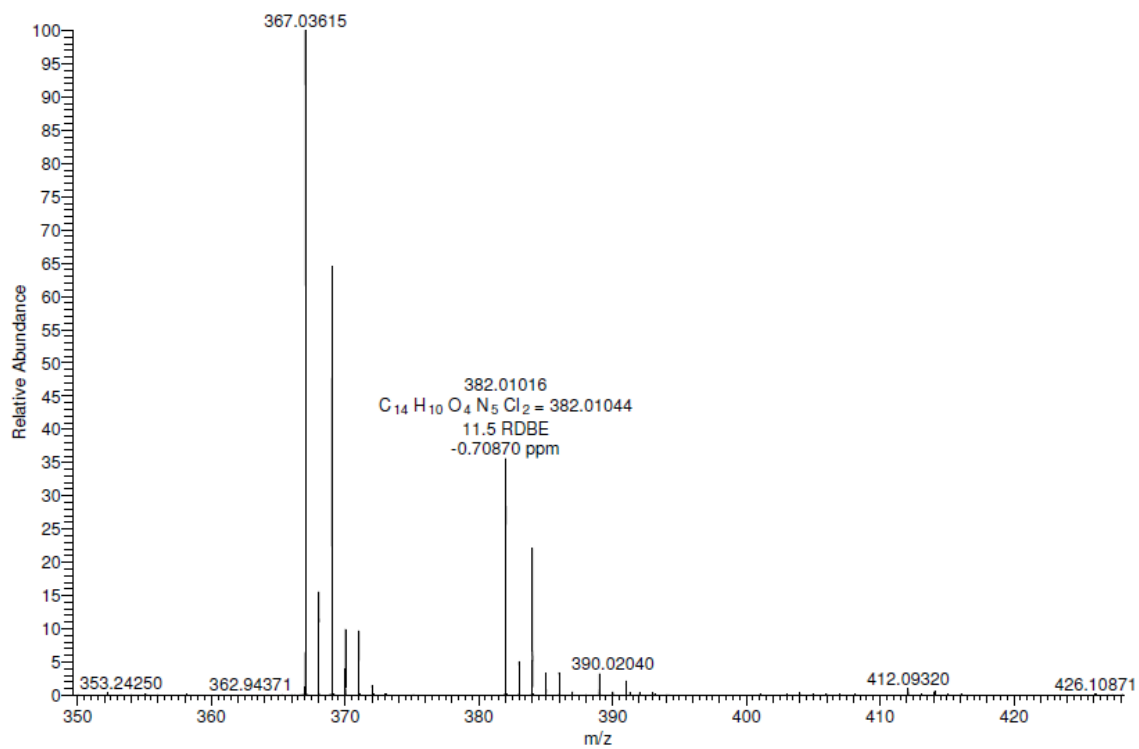

## $^1H$ NMR Spectrum of Compound **9g**

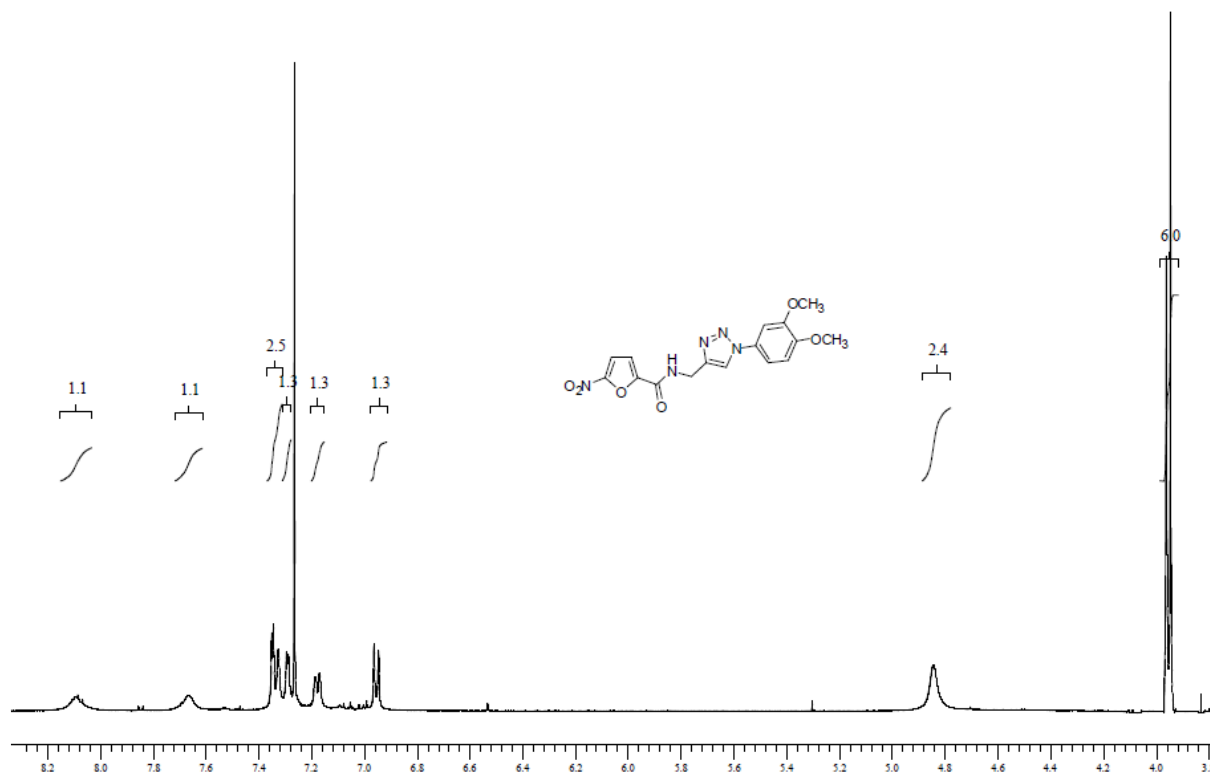

### <sup>13</sup>C NMR Spectrum of Compound **9g**

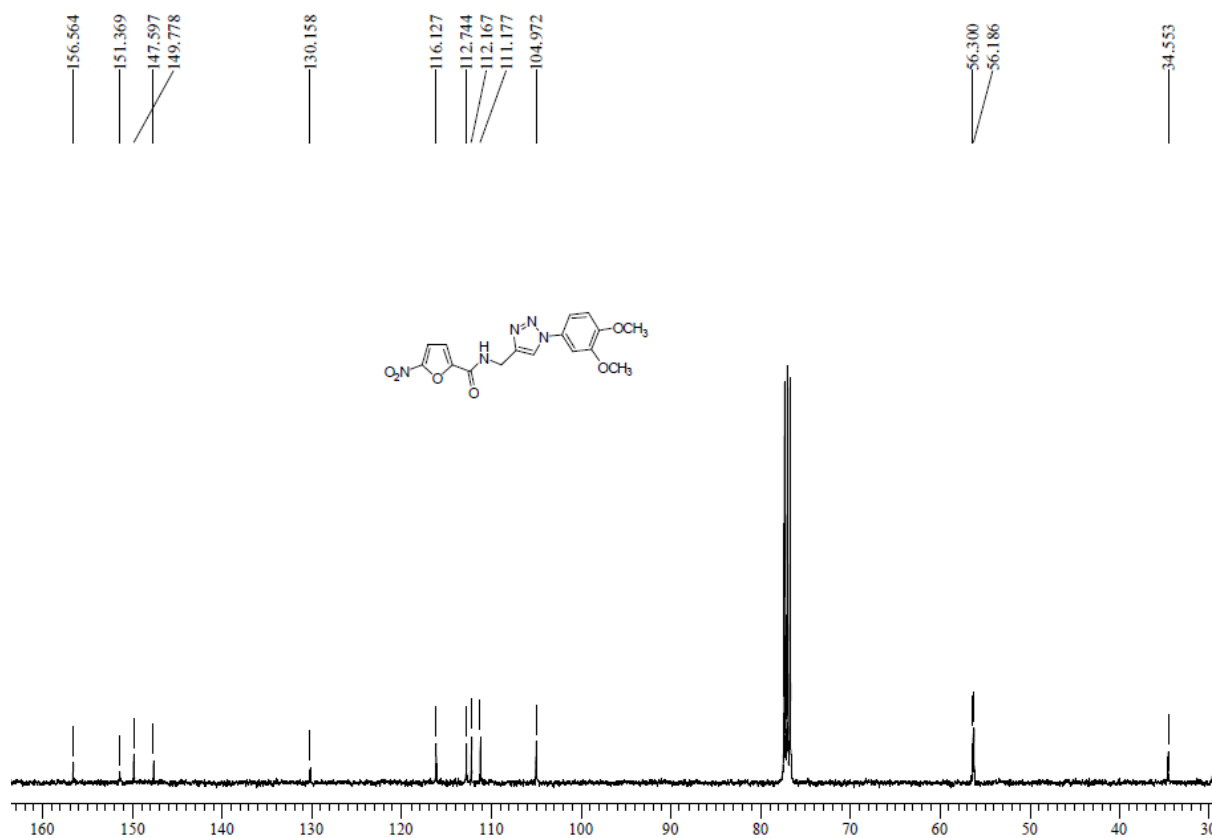

### HRMS of Compound **9g**

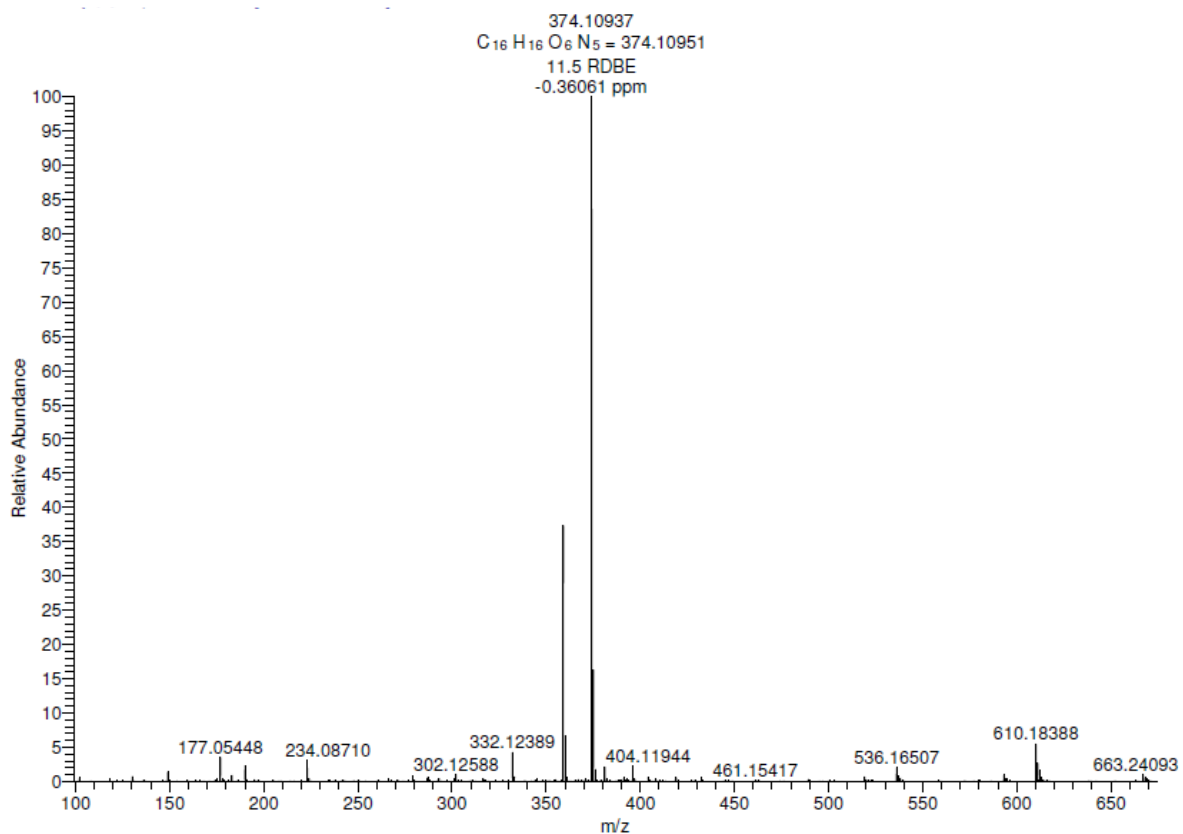

### <sup>1</sup>H NMR Spectrum of Compound **9h**

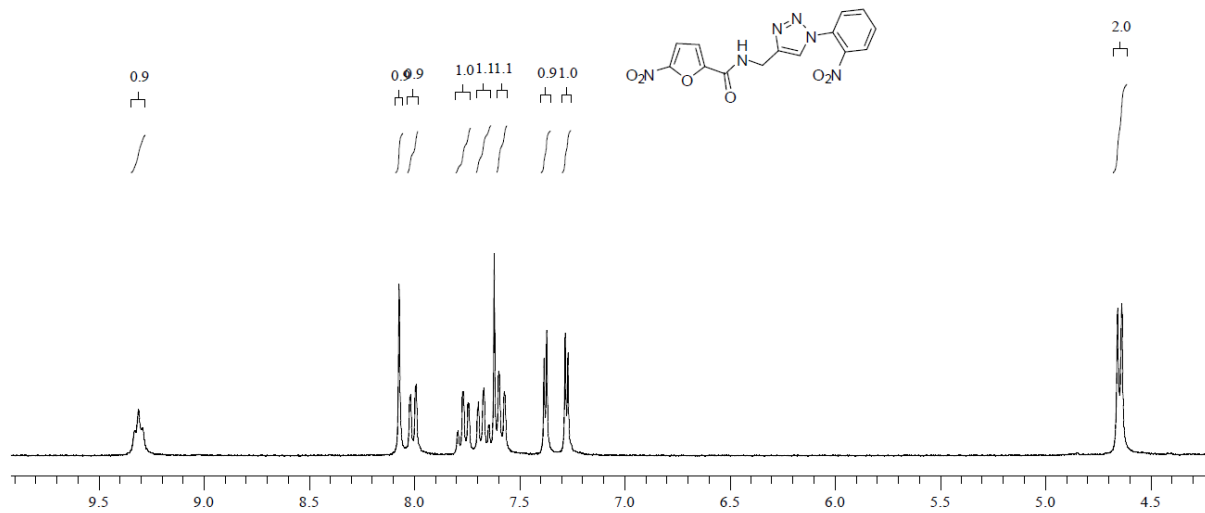

### <sup>13</sup>C NMR Spectrum of Compound **9h**

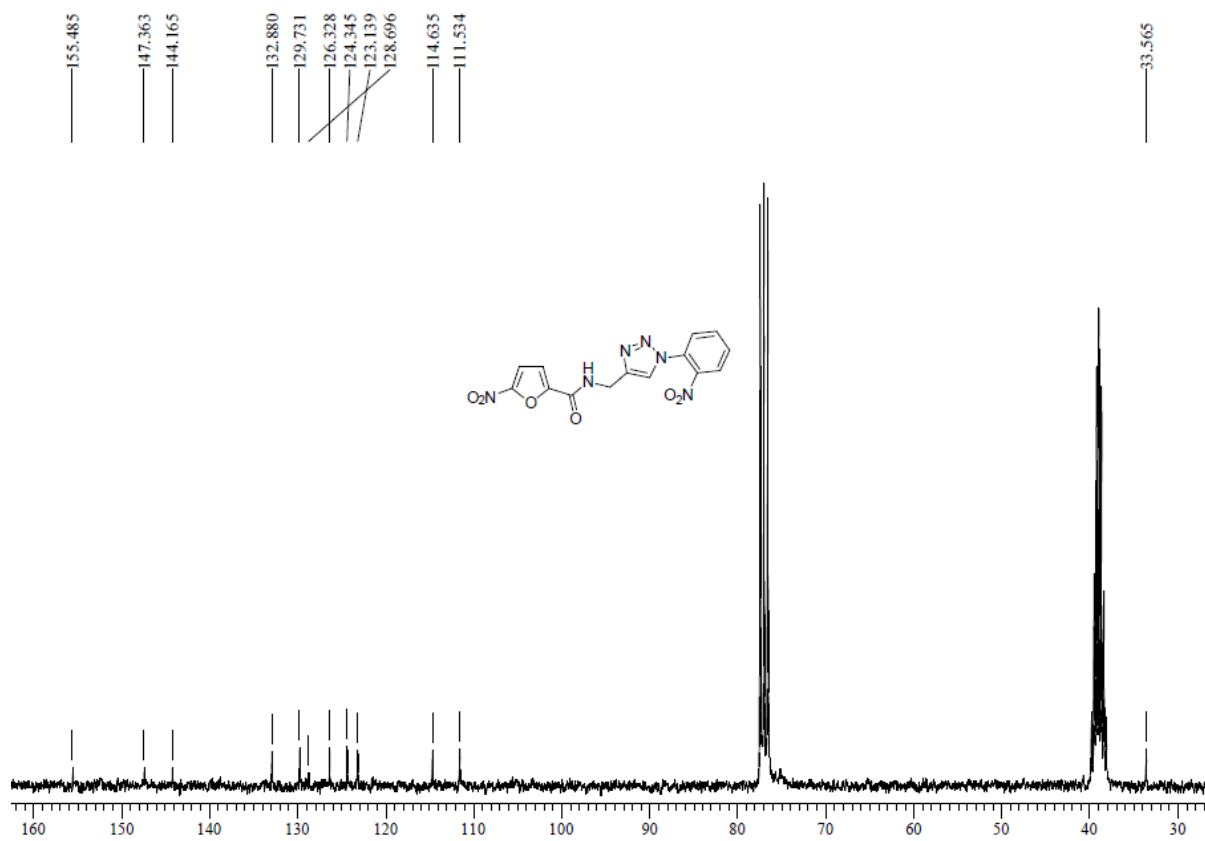

## HRMS of Compound **9h**

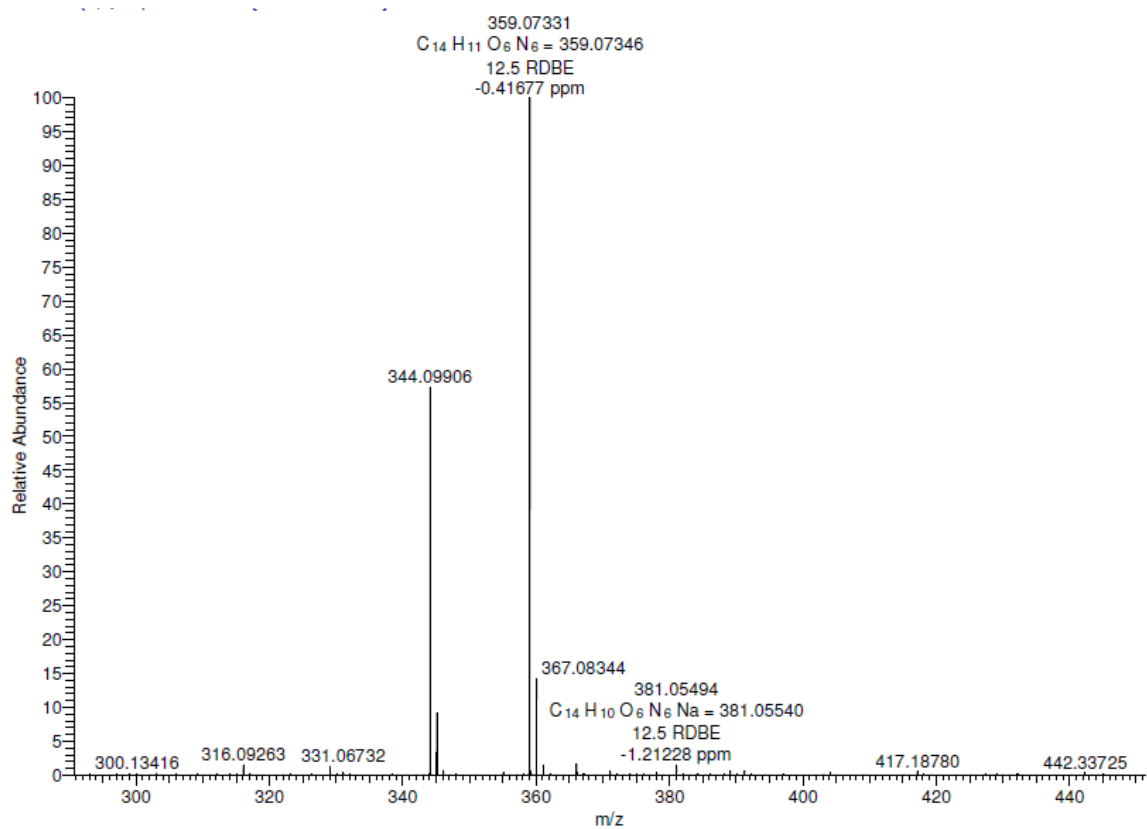

## <sup>1</sup>H NMR Spectrum of Compound **9i**

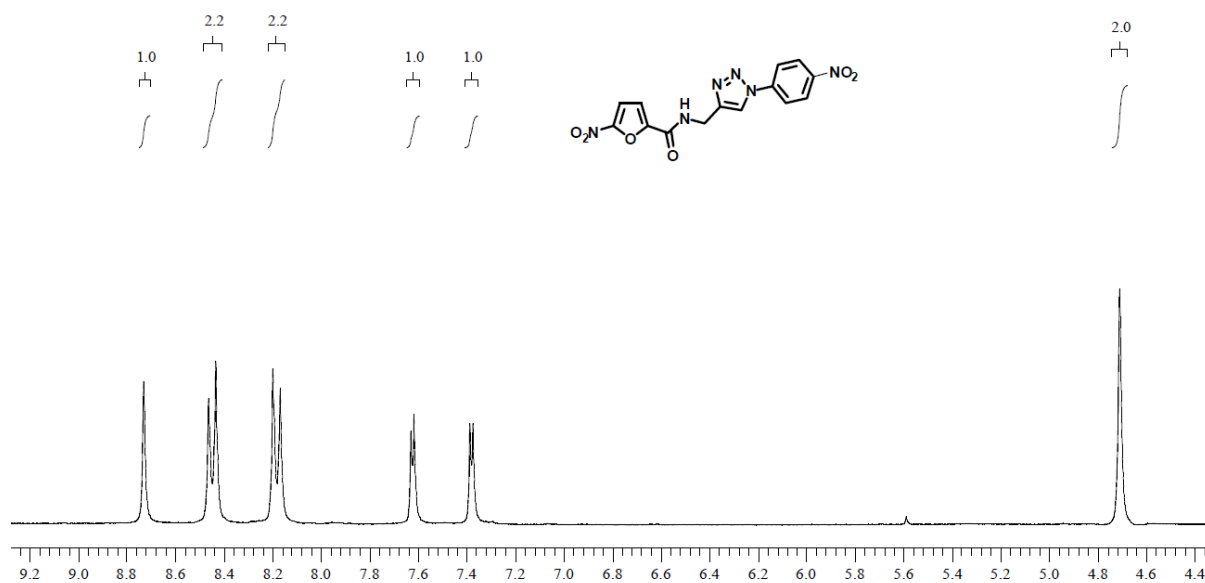

### <sup>13</sup>C NMR Spectrum of Compound **9i**

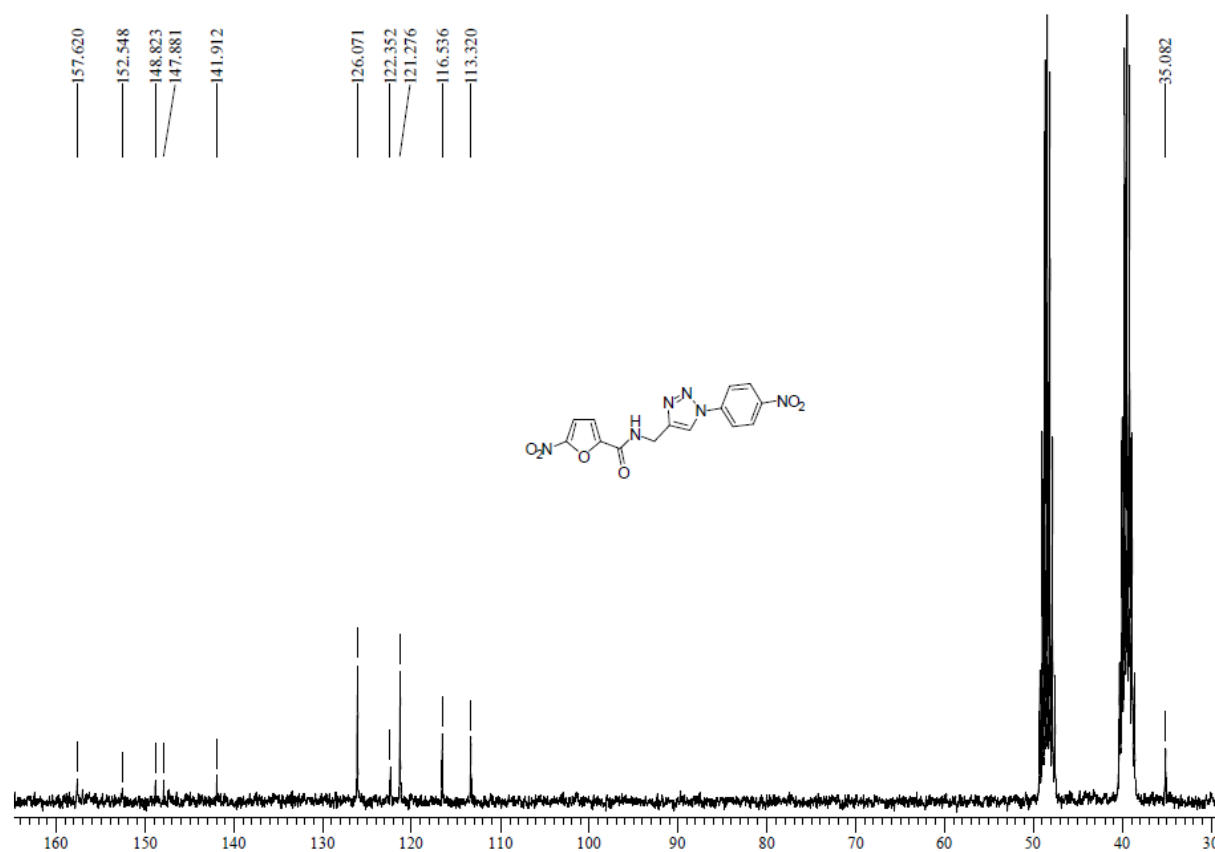

### HRMS of Compound **9i**

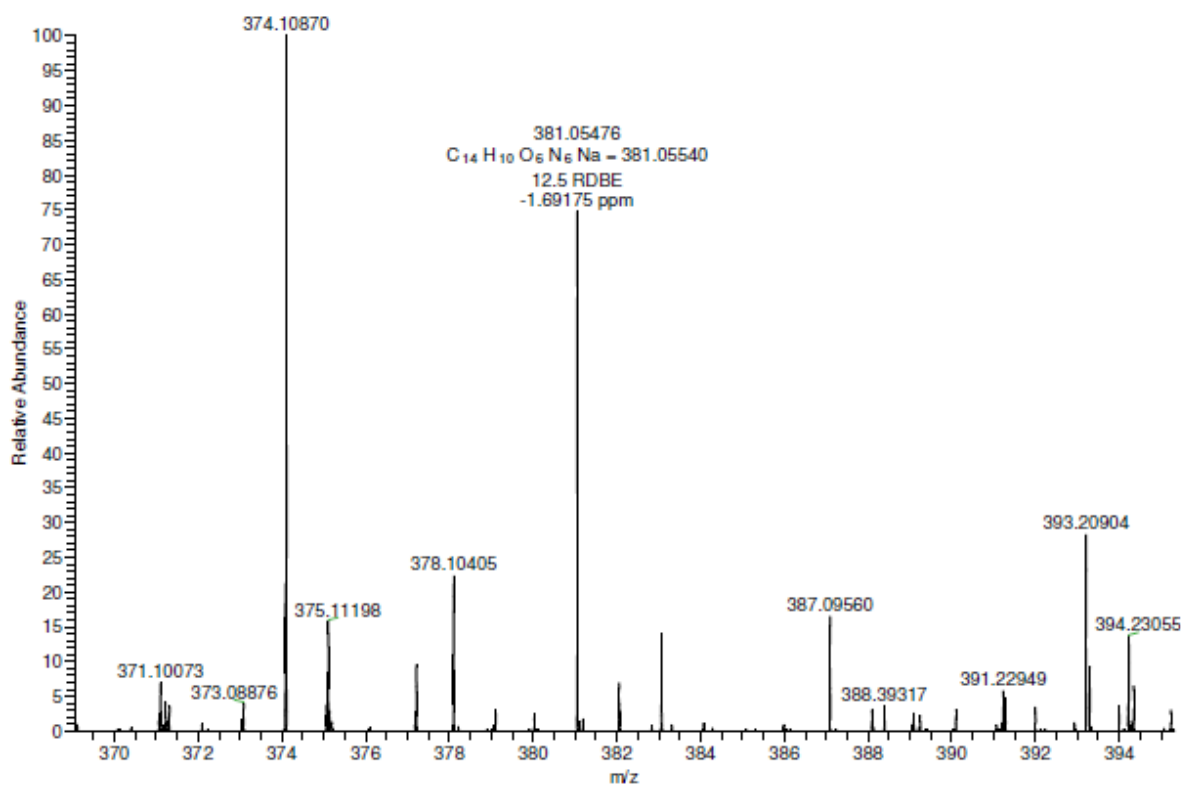

### <sup>1</sup>H NMR Spectrum of Compound **9j**

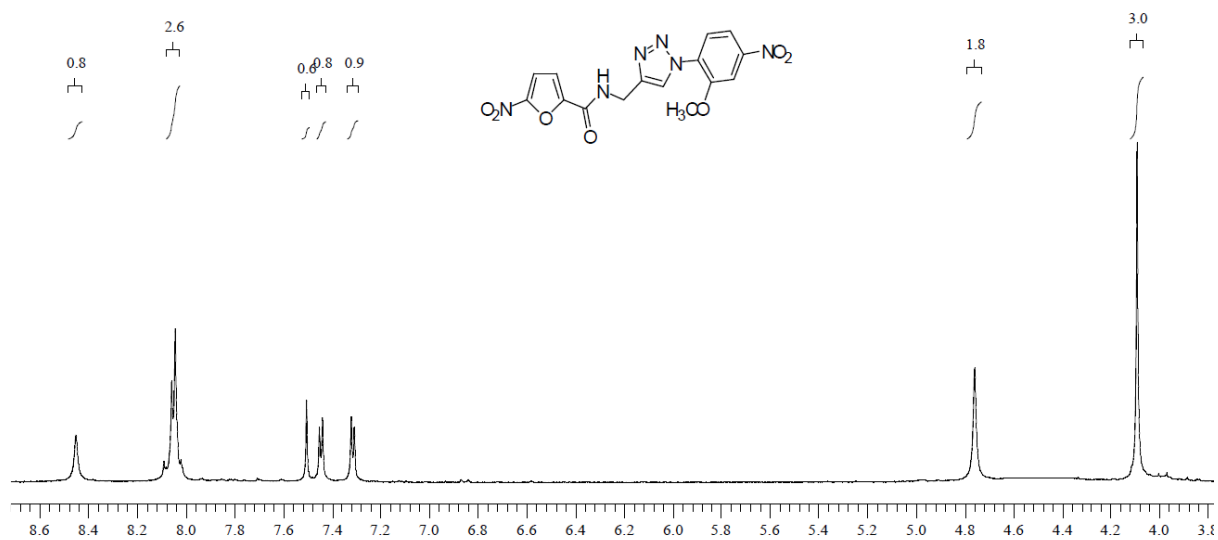

### <sup>13</sup>C NMR Spectrum of Compound **9j**

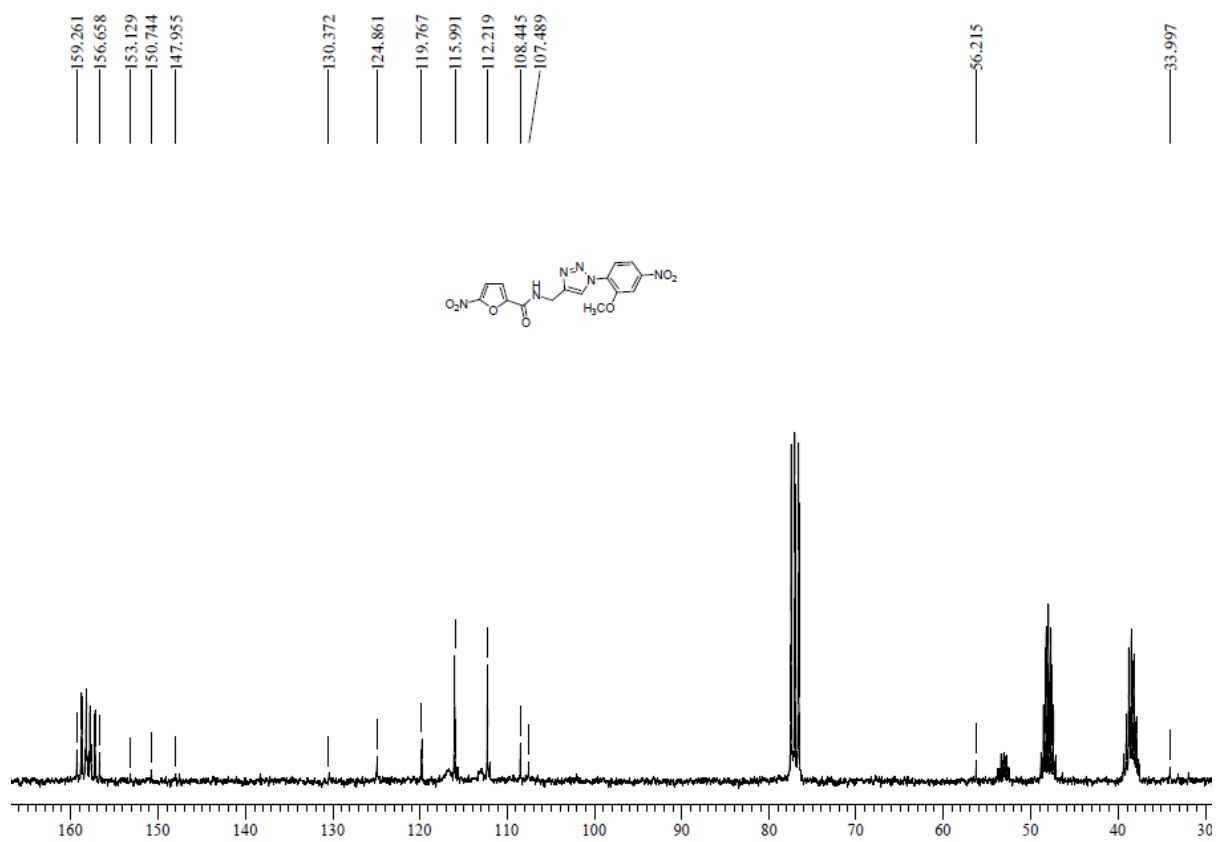

## HRMS of Compound 9j

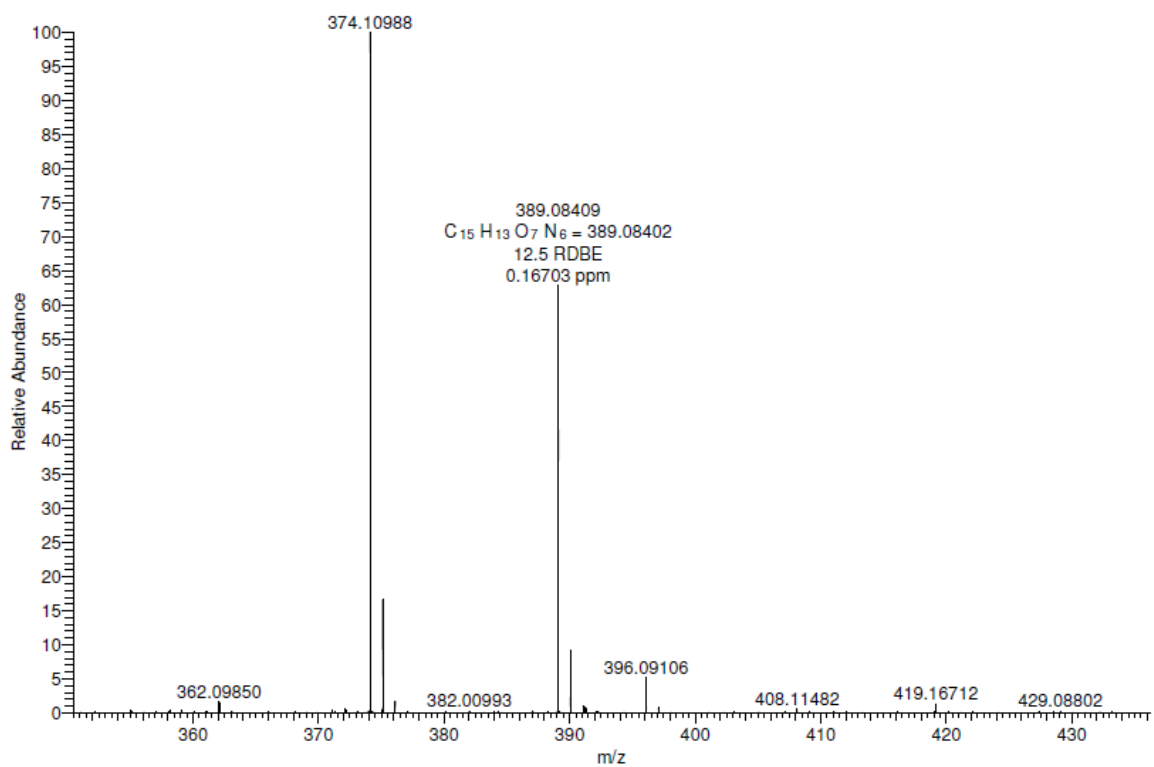

## <sup>1</sup>H NMR Spectrum of Compound 9k

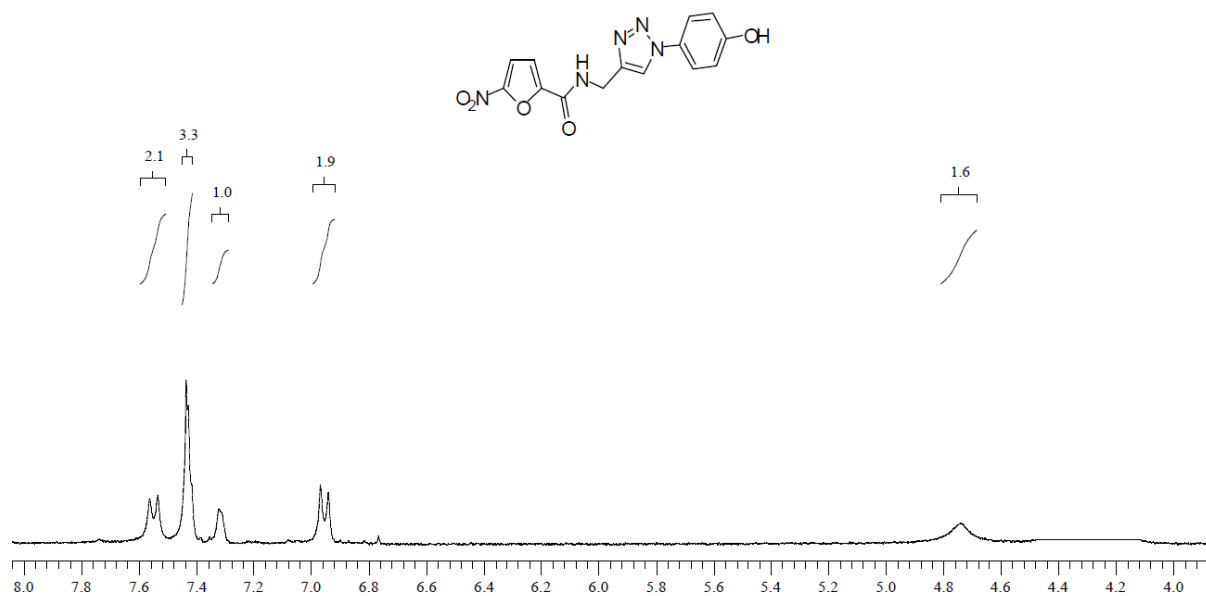



# <sup>13</sup>C NMR Spectrum of Compound **9k**

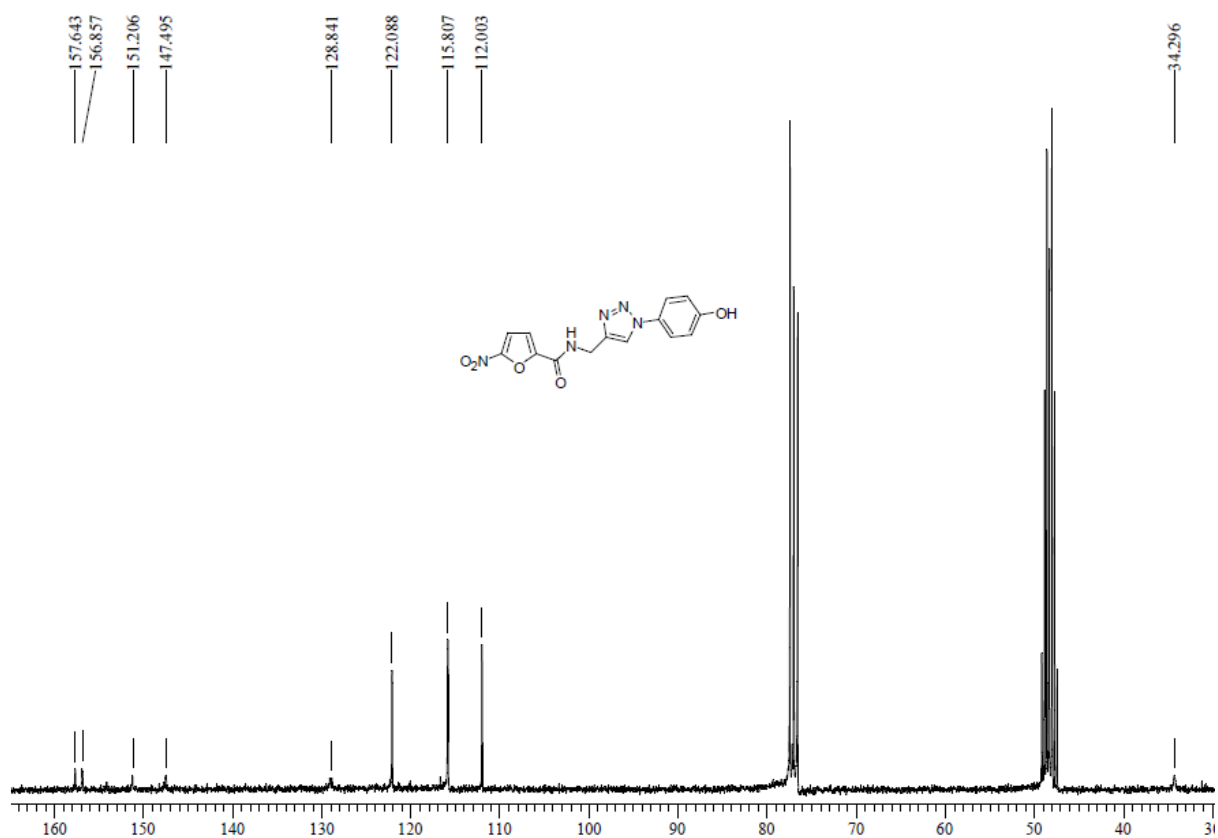

# HRMS of Compound **9k**

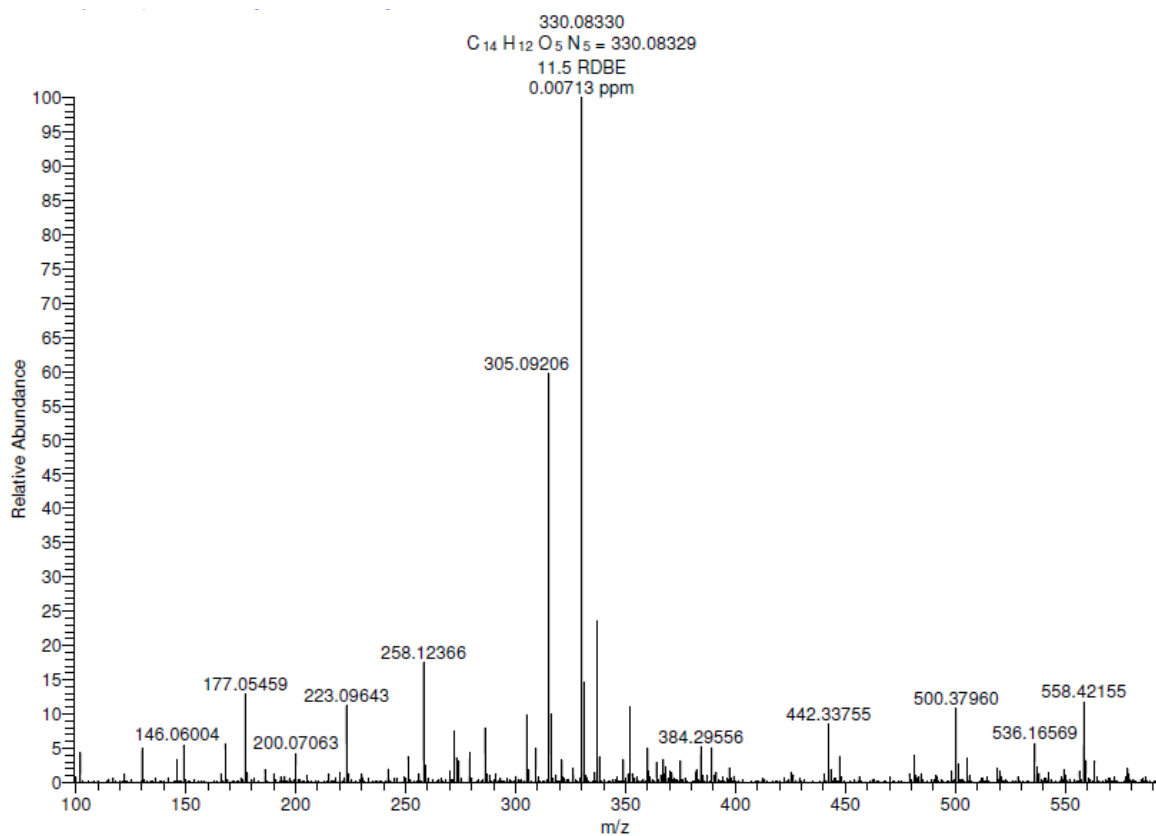

# <sup>1</sup>H NMR Spectrum of Compound **91**

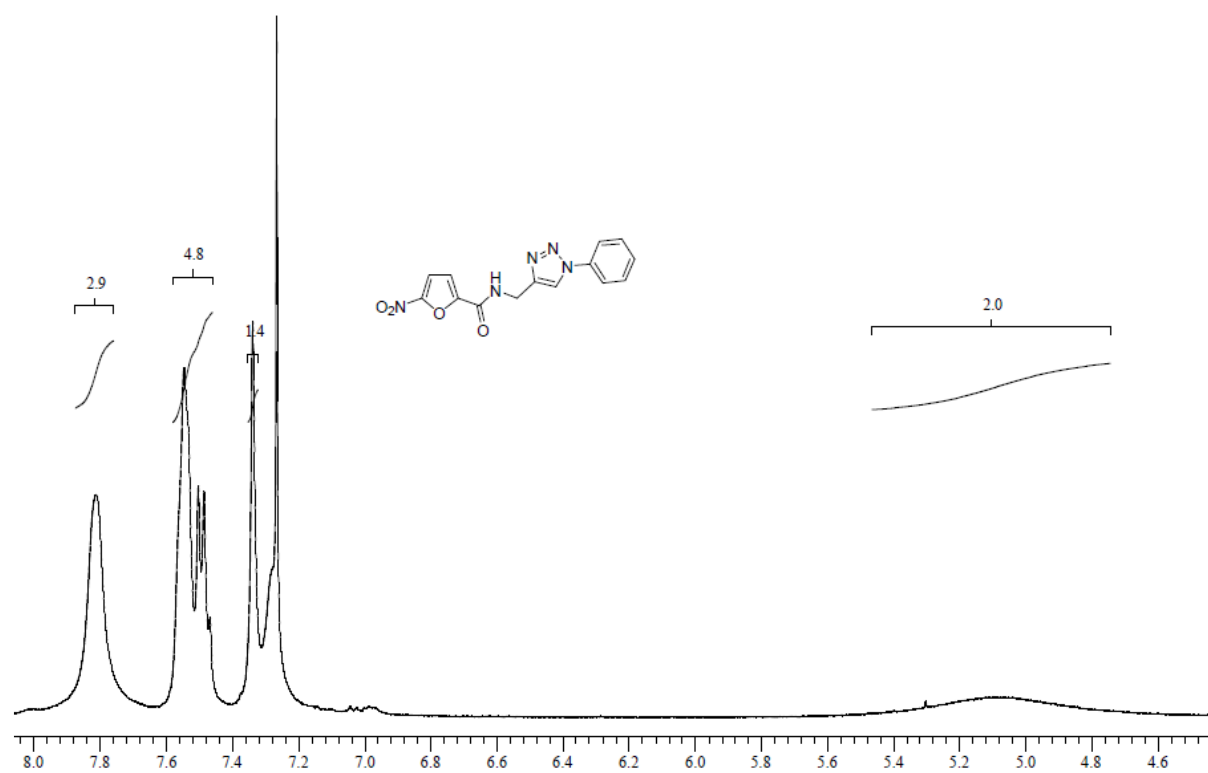

# <sup>13</sup>C NMR Spectrum of Compound **91**

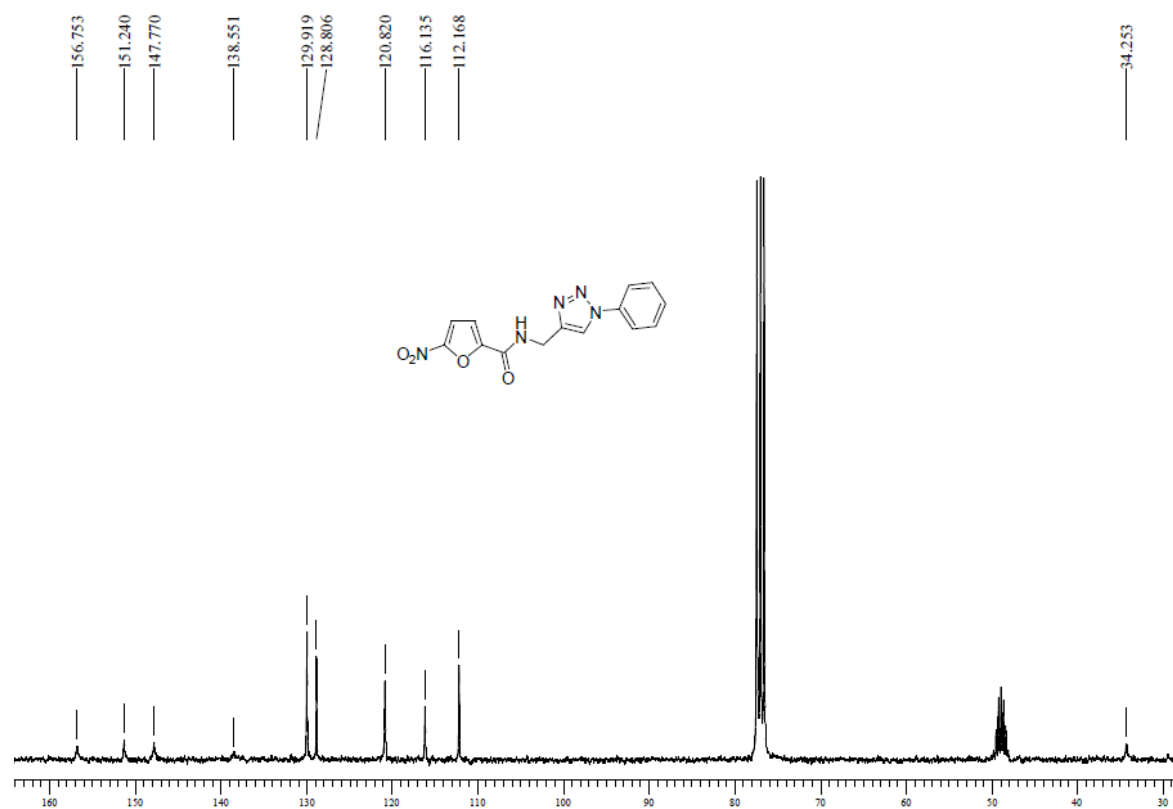

## HRMS of Compound **9l**

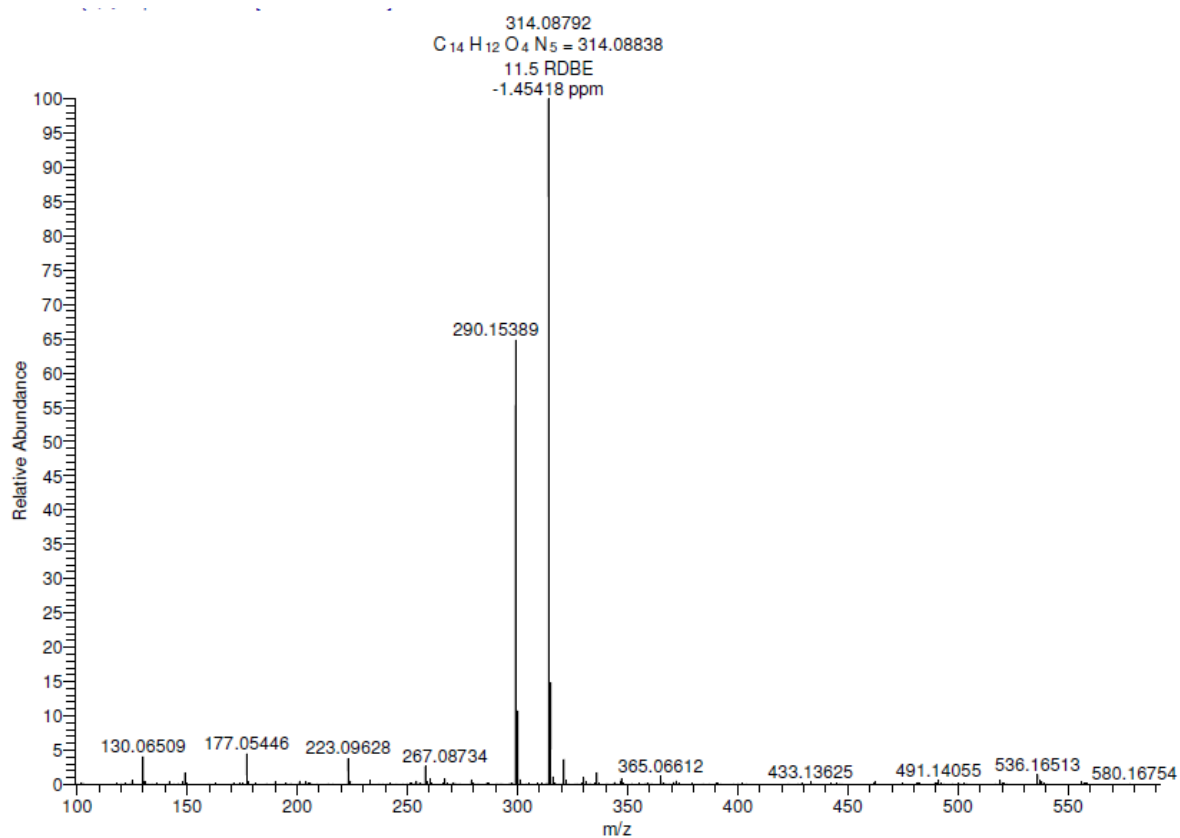

## <sup>1</sup>H NMR Spectrum of Compound **9m**

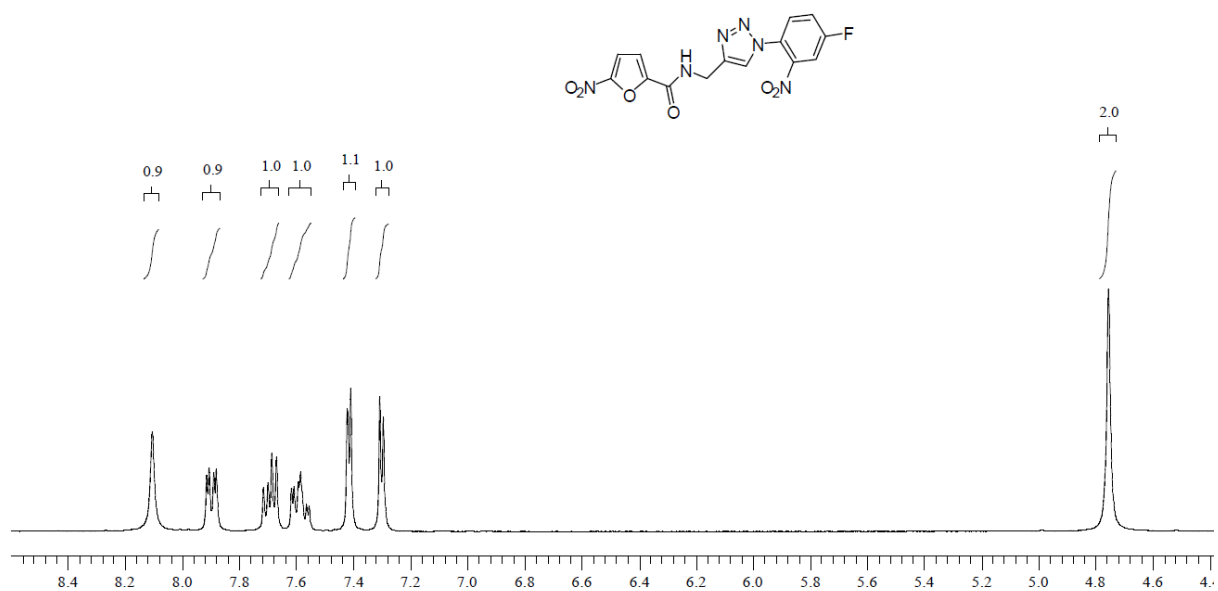

### <sup>13</sup>C NMR Spectrum of Compound **9m**

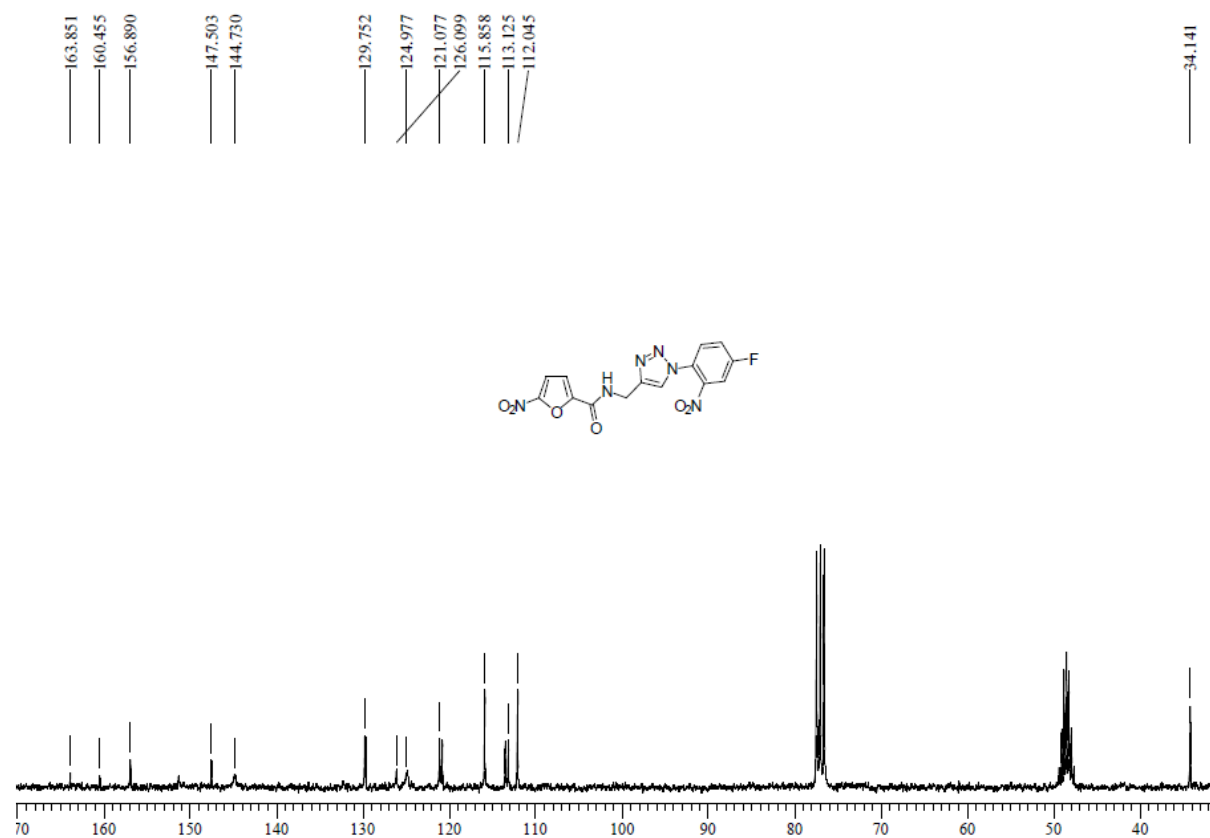

### HRMS of Compound **9m**

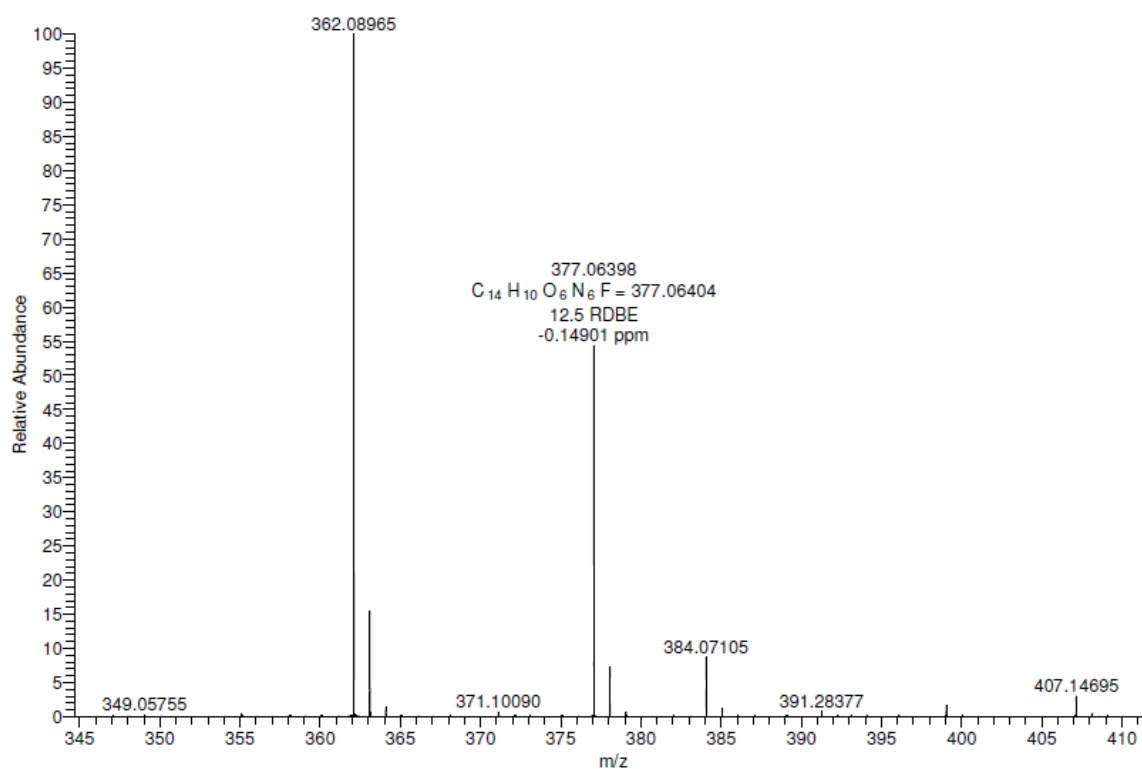

### <sup>1</sup>H NMR Spectrum of Compound **9n**

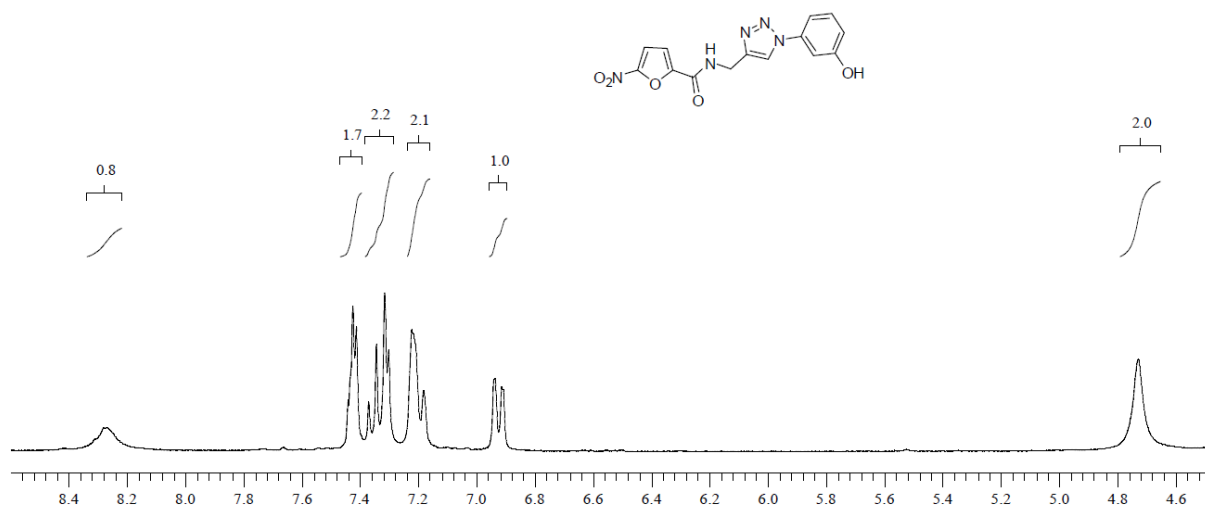

### <sup>13</sup>C NMR Spectrum of Compound **9n**

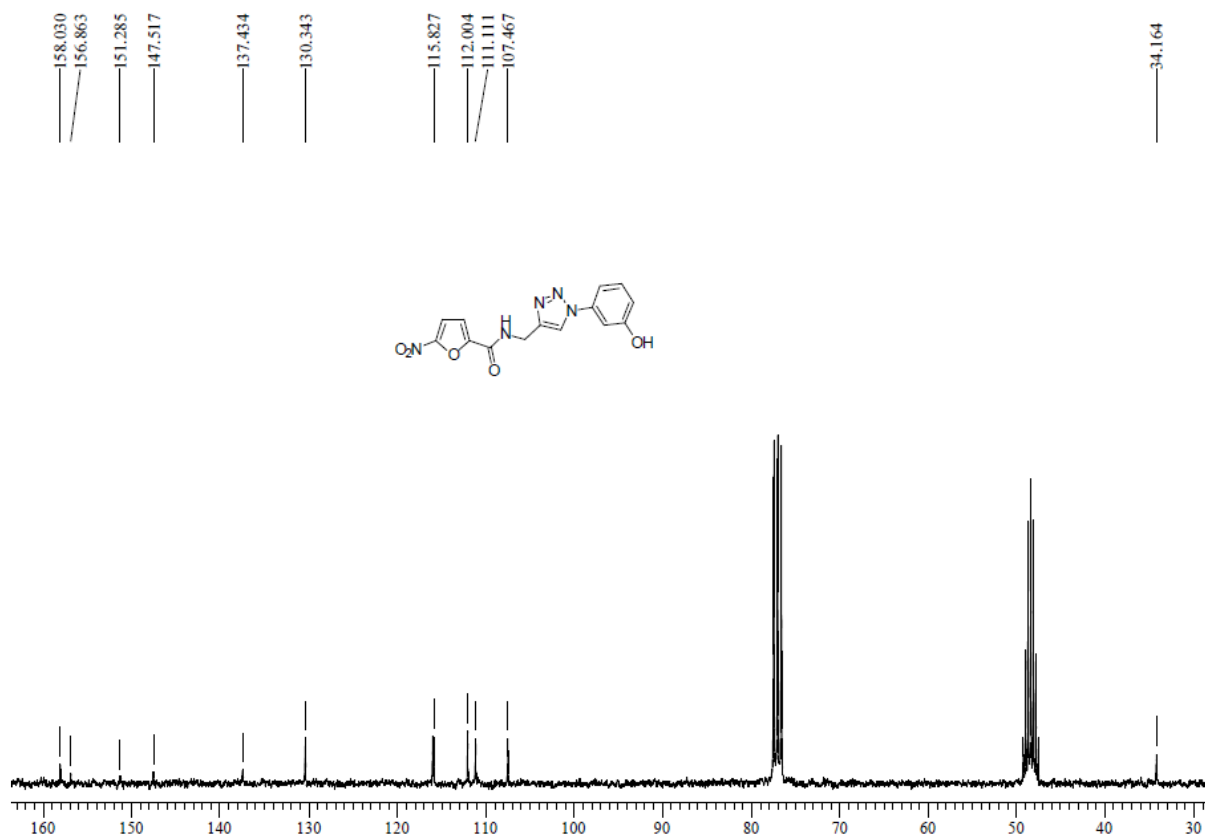

# HRMS of Compound **9n**

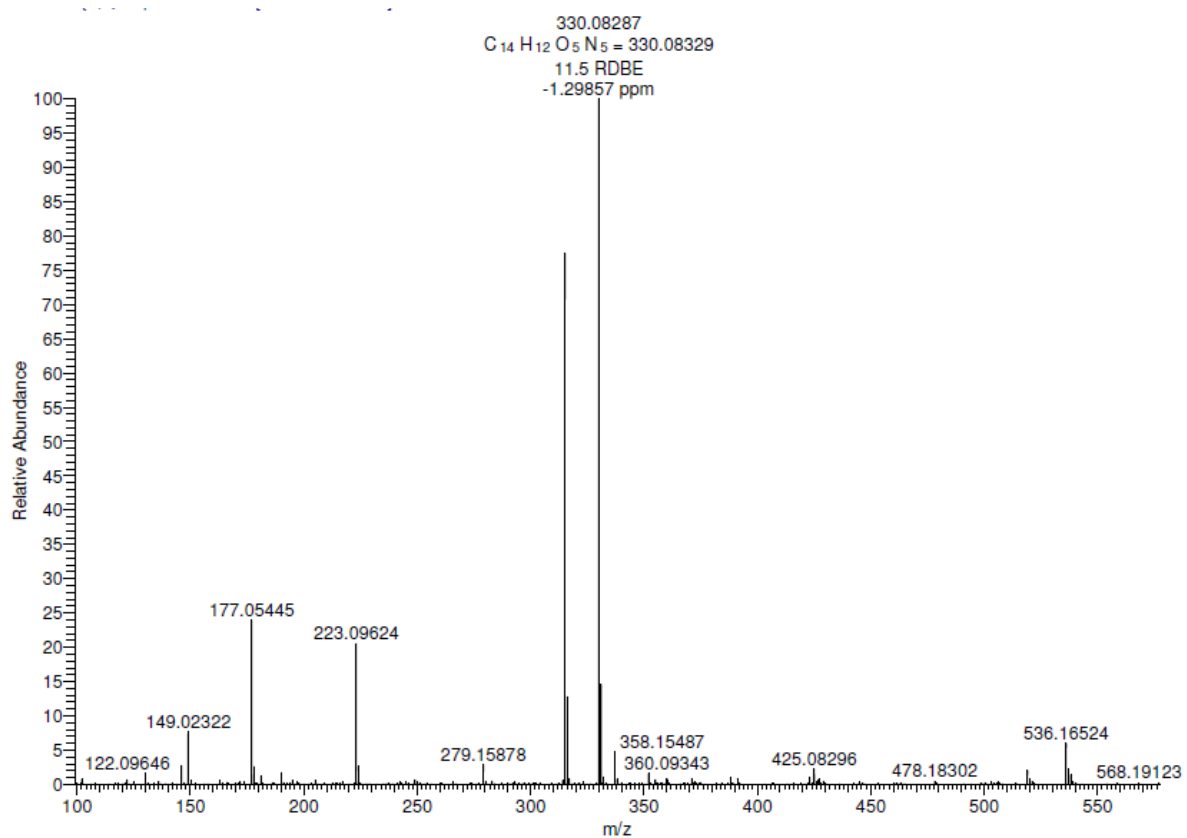

Supplement: c5ob01353d1.pdf [file c5ob01353d1.pdf]
